# Supplementary material
Source: PubMed Central journal article supplement (PMC4512207)
Supplement: NIHMS707689-supplement-Supporting_Information.pdf [file NIHMS707689-supplement-Supporting_Information.pdf]

# Supporting Info for “Converging Nuclear Magnetic Shielding Calculations with Respect to Basis and System Size in Protein Systems”

Joshua D. Hartman, Thomas J. Neubauer, Bethany G. Caulkins, Leonard J.  
Mueller, and Gregory J. O. Beran\*

*Department of Chemistry, University of California, Riverside, California 92521 USA*

E-mail: gregory.beran@ucr.edu

May 7, 2015

## Contents

|          |                                                                                              |          |
|----------|----------------------------------------------------------------------------------------------|----------|
| <b>1</b> | <b>Experimental Measurement of Select Chemical Shifts for the 2AP Quinonoid Intermediate</b> | <b>2</b> |
| <b>2</b> | <b>2AP system</b>                                                                            | <b>5</b> |
| 2.1      | 2AP coenzyme/substrate only . . . . .                                                        | 5        |
| 2.2      | 2AP coenzyme/substrate in a 5 Å protein cluster. . . . .                                     | 6        |
| 2.3      | 2AP coenzyme/substrate in a 7 Å protein cluster. . . . .                                     | 16       |

---

\*To whom correspondence should be addressed

|          |                                                  |           |
|----------|--------------------------------------------------|-----------|
| <b>3</b> | <b>F9 system</b>                                 | <b>30</b> |
| 3.1      | F9 substrate . . . . .                           | 30        |
| 3.2      | F9 substrate in a 5 Å protein cluster . . . . .  | 31        |
| 3.3      | F9 substrate in an 8 Å protein cluster . . . . . | 40        |

This file contains (1) details of the experimental chemical shifts for 2AP and (2) Cartesian XYZ coordinates for the bare substrates and the different sized substrate/protein clusters used in the paper, in units of Angstroms.

# 1 Experimental Measurement of Select Chemical Shifts for the 2AP Quinonoid Intermediate

**Sample Preparation:** Selectively  $^{13}\text{C}/^{15}\text{N}$  enriched PLP was synthesized and exchanged into *S. typhimurium* tryptophan synthase as previously described.[1] Microcrystals of the enzyme with labeled and unlabeled coenzyme were prepared and packed into a Bruker 4 mm magic-angle-spinning rotor (volume  $\approx 80 \mu\text{L}$ ) with the aid of a bench top centrifuge (10,000 rpm); each rotor contained approximately 25-30 mg of protein. The 2AP quinonoid intermediate was formed *in situ* by the addition of 5  $\mu\text{L}$  of 1.2 M L-serine (unlabeled,  $^{15}\text{N}$ -labeled, or U- $^{13}\text{C}$ -labeled) and 8  $\mu\text{L}$  of a concentrated stock solution of 2AP (unlabeled or  $^{15}\text{N}$ -labeled) in acetonitrile.

**NMR Experiments:** Solid-state NMR experiments were performed at 9.4 T (400.37 MHz  $^1\text{H}$ , 40.57 MHz  $^{15}\text{N}$ ) on a Bruker AVIII spectrometer equipped with an  $^1\text{H}$ - $^{13}\text{C}$ - $^{15}\text{N}$  triple resonance 4 mm MAS probe spinning at a MAS rate of 8 kHz and with the bearing gas cooled to  $-15 \text{ }^\circ\text{C}$ , giving an effective sample temperature of  $-5 \text{ }^\circ\text{C}$ . Cross-polarization was accomplished at a  $^1\text{H}$  spin-lock field of 45 kHz, a  $^{13}\text{C}/^{15}\text{N}$  spin-lock field of 37 kHz (ramped  $\pm 2$  kHz), and a contact time of 2 ms; 85 kHz Spinal64 [2]  $^1\text{H}$  decoupling was used throughout.  $^{15}\text{N}$  spectra were acquired as the sum of 81,920 transients using a relaxation delay of 4 s, for a total acquisition time of 3 days 19 h.  $^{15}\text{N}$  chemical shifts were referenced indirectly to  $\text{NH}_3(\text{l})$  via an external solid-state sample of  $^{15}\text{NH}_4\text{Cl}$  ( $\delta[\text{NH}_3(\text{l})] = 39.3$  ppm) calibrated under MAS conditions.  $^{13}\text{C}$  spectra were acquired as the sum of 16,384 transients acquired with a relaxation delay of 4 s, for a total acquisition time of 18 h.  $^{13}\text{C}$  chemical shifts were referenced indirectly to TMS(l) via an external solid-state sample of adamantane ( $\delta[\text{TMS}] = 38.48$  ppm) calibrated under MAS conditions.

**Chemical Shifts:** Chemical shifts were measured for N1, C2, and C3 on PLP (shown in black), N,  $\text{C}^\alpha$ ,  $\text{C}^\beta$ , and C' for the segment derived from serine (shown in blue), and N for the segment derived from 2AP (shown in red). These shifts are summarized below:

**Linear Regression models:** As described in the main text, the isotropic chemical shielding values were converted to chemical shifts via least-squares fitting for the carbon and nitrogen shieldings. The absolute shieldings, linear regression parameters, and resulting chemical shifts are provided here.

Table 1: Experimentally measured  $^{13}\text{C}$  and  $^{15}\text{N}$  chemical shifts for selected atoms in 2AP.

| Site                    | Chemical Shift (ppm) |
|-------------------------|----------------------|
| $\text{C}^\alpha$ (Ser) | 105.1                |
| $\text{C}^\beta$ (Ser)  | 47.0                 |
| $\text{C}'$ (Ser)       | 173.1                |
| N (Ser)                 | 298.6                |
| N (2AP)                 | 55.9                 |
| C2 (PLP)                | 144.6                |
| C3 (PLP)                | 153.1                |
| N1 (PLP)                | 265.0                |

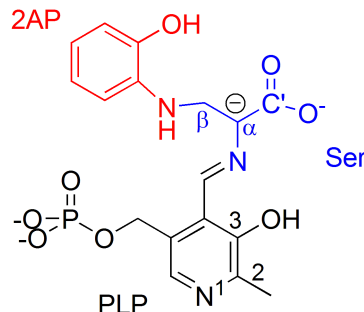

Table 2:  $^{13}\text{C}$  Carbon chemical shieldings and shifts for selected atoms in 2AP.

|                                             | 5 Å Cluster | 7 Å Cluster | 5 Å ONIOM  | Experiment |
|---------------------------------------------|-------------|-------------|------------|------------|
| <b><i>Chemical Shieldings:</i></b>          |             |             |            |            |
| C3 (PLP)                                    | 26.7        | 26.6        | 26.2       |            |
| C2 (PLP)                                    | 39.1        | 37.1        | 36.3       |            |
| $\text{C}^\alpha$ (Ser)                     | 68.3        | 68.8        | 67.7       |            |
| $\text{C}'$ (Ser)                           | 2.5         | 2.7         | 2.3        |            |
| $\text{C}^\beta$ (Ser)                      | 126.7       | 126.9       | 126.3      |            |
| <b><i>Linear Regression Parameters:</i></b> |             |             |            |            |
| Slope:                                      | -1.0403     | -1.0402     | -1.0418    |            |
| Intercept:                                  | 179.51      | 179.09      | 178.51     |            |
| <b><i>Chemical Shifts:</i></b>              |             |             |            |            |
| C3 (PLP)                                    | 151.5       | 151.2       | 151.2      | 153.1      |
| C2 (PLP)                                    | 139.2       | 140.9       | 140.7      | 144.6      |
| $\text{C}^\alpha$ (Ser)                     | 108.5       | 107.8       | 107.9      | 105.1      |
| $\text{C}'$ (Ser)                           | 176.7       | 176.1       | 176.1      | 173.1      |
| $\text{C}^\beta$ (Ser)                      | 47.1        | 46.9        | 46.9       | 47.0       |
| <b>C rms</b>                                | <b>3.4</b>  | <b>2.6</b>  | <b>2.7</b> |            |

Table 3:  $^{15}\text{N}$  Nitrogen chemical shieldings and shifts for selected atoms in 2AP.

|                                             | 5 Å Cluster | 7 Å Cluster | 5 Å ONIOM  | Experiment |
|---------------------------------------------|-------------|-------------|------------|------------|
| <b><i>Chemical Shieldings:</i></b>          |             |             |            |            |
| N (Ser)                                     | -80.5       | -80.7       | -80.7      |            |
| N (2AP)                                     | 177.4       | 177.2       | 177.3      |            |
| N1 (PLP)                                    | -32.3       | -34.9       | -34.8      |            |
| <b><i>Linear Regression Parameters:</i></b> |             |             |            |            |
| Slope:                                      | -0.9578     | -0.9549     | -0.9547    |            |
| Intercept:                                  | 227.10      | 226.12      | 226.17     |            |
| <b><i>Chemical Shifts:</i></b>              |             |             |            |            |
| N (Ser)                                     | 304.2       | 303.2       | 303.2      | 298.6      |
| N (2AP)                                     | 57.2        | 56.9        | 56.9       | 55.9       |
| N1 (PLP)                                    | 258.1       | 259.4       | 259.4      | 265.0      |
| <b>N rms</b>                                | <b>5.2</b>  | <b>4.2</b>  | <b>4.3</b> |            |

## 2 2AP system

### 2.1 2AP coenzyme/substrate only

45

2AP coenzyme-substrate complex only

|   |           |           |           |
|---|-----------|-----------|-----------|
| O | 3.891392  | -3.220755 | -0.725068 |
| C | 4.310711  | -2.075858 | -0.116111 |
| C | 5.645943  | -1.823861 | 0.228945  |
| C | 5.977446  | -0.626483 | 0.880147  |
| C | 4.979548  | 0.314007  | 1.143125  |
| C | 3.650188  | 0.069253  | 0.773100  |
| C | 3.302772  | -1.139979 | 0.169234  |
| N | 1.944591  | -1.482886 | -0.122198 |
| O | 1.615698  | 4.718715  | -0.209624 |
| P | 0.900404  | 3.566888  | -0.962364 |
| O | 1.854691  | 2.536140  | -1.599124 |
| O | -0.213032 | 4.109356  | -1.877248 |
| O | 0.161834  | 2.573427  | 0.167627  |
| C | -0.927718 | 3.036275  | 0.951474  |
| C | -2.194024 | 2.247409  | 0.689015  |
| C | -3.385049 | 2.932374  | 0.494501  |
| N | -4.579713 | 2.361219  | 0.268415  |
| C | -2.241361 | 0.828016  | 0.669102  |
| C | -3.506564 | 0.220348  | 0.372756  |
| O | -3.646114 | -1.119623 | 0.256136  |
| C | -4.631642 | 1.022022  | 0.190367  |
| C | -5.969095 | 0.398403  | -0.147458 |
| C | -1.075168 | 0.015740  | 0.863988  |
| N | -1.206247 | -1.290857 | 0.742094  |
| C | -0.238571 | -2.210191 | 0.810519  |
| C | -0.512045 | -3.524336 | 0.256375  |
| O | -1.697169 | -3.822446 | -0.143558 |
| O | 0.506022  | -4.309608 | 0.148847  |
| C | 1.171187  | -1.823699 | 1.143105  |
| H | 4.637150  | -3.641851 | -1.218106 |
| H | 6.409962  | -2.581591 | 0.006514  |
| H | 7.011173  | -0.440448 | 1.187817  |
| H | 5.233305  | 1.248173  | 1.645438  |
| H | 2.883587  | 0.816571  | 0.925837  |
| H | -0.636022 | 2.955638  | 2.028168  |
| H | -1.123414 | 4.099876  | 0.744307  |
| H | -3.370981 | 4.032872  | 0.531222  |
| H | -5.984128 | -0.691259 | 0.043910  |
| H | -6.202953 | 0.540554  | -1.224387 |

|   |           |           |           |
|---|-----------|-----------|-----------|
| H | -6.771955 | 0.888844  | 0.431277  |
| H | -0.129746 | 0.497025  | 1.105969  |
| H | 1.673893  | -2.656883 | 1.658707  |
| H | 1.200174  | -0.937092 | 1.791381  |
| H | -2.697197 | -1.512388 | 0.405410  |
| H | 1.961505  | -2.396316 | -0.588773 |

## 2.2 2AP coenzyme/substrate in a 5 Å protein cluster.

456

2AP surrounded by a 5 Å cut of tryptophan synthase

|   |             |             |             |
|---|-------------|-------------|-------------|
| O | 3.89139200  | -3.22075500 | -0.72506800 |
| C | 4.31071100  | -2.07585800 | -0.11611100 |
| C | 5.64594300  | -1.82386100 | 0.22894500  |
| C | 5.97744600  | -0.62648300 | 0.88014700  |
| C | 4.97954800  | 0.31400700  | 1.14312500  |
| C | 3.65018800  | 0.06925300  | 0.77310000  |
| C | 3.30277200  | -1.13997900 | 0.16923400  |
| N | 1.94459100  | -1.48288600 | -0.12219800 |
| O | 1.61569800  | 4.71871500  | -0.20962400 |
| P | 0.90040400  | 3.56688800  | -0.96236400 |
| O | 1.85469100  | 2.53614000  | -1.59912400 |
| O | -0.21303200 | 4.10935600  | -1.87724800 |
| O | 0.16183400  | 2.57342700  | 0.16762700  |
| C | -0.92771800 | 3.03627500  | 0.95147400  |
| C | -2.19402400 | 2.24740900  | 0.68901500  |
| C | -3.38504900 | 2.93237400  | 0.49450100  |
| N | -4.57971300 | 2.36121900  | 0.26841500  |
| C | -2.24136100 | 0.82801600  | 0.66910200  |
| C | -3.50656400 | 0.22034800  | 0.37275600  |
| O | -3.64611400 | -1.11962300 | 0.25613600  |
| C | -4.63164200 | 1.02202200  | 0.19036700  |
| C | -5.96909500 | 0.39840300  | -0.14745800 |
| C | -1.07516800 | 0.01574000  | 0.86398800  |
| N | -1.20624700 | -1.29085700 | 0.74209400  |
| C | -0.23857100 | -2.21019100 | 0.81051900  |
| C | -0.51204500 | -3.52433600 | 0.25637500  |
| O | -1.69716900 | -3.82244600 | -0.14355800 |
| O | 0.50602200  | -4.30960800 | 0.14884700  |
| C | 1.17118700  | -1.82369900 | 1.14310500  |
| H | 4.63715000  | -3.64185100 | -1.21810600 |
| H | 6.40996200  | -2.58159100 | 0.00651400  |
| H | 7.01117300  | -0.44044800 | 1.18781700  |

|   |             |             |             |
|---|-------------|-------------|-------------|
| H | 5.23330500  | 1.24817300  | 1.64543800  |
| H | 2.88358700  | 0.81657100  | 0.92583700  |
| H | -0.63602200 | 2.95563800  | 2.02816800  |
| H | -1.12341400 | 4.09987600  | 0.74430700  |
| H | -3.37098100 | 4.03287200  | 0.53122200  |
| H | -5.98412800 | -0.69125900 | 0.04391000  |
| H | -6.20295300 | 0.54055400  | -1.22438700 |
| H | -6.77195500 | 0.88884400  | 0.43127700  |
| H | -0.12974600 | 0.49702500  | 1.10596900  |
| H | 1.67389300  | -2.65688300 | 1.65870700  |
| H | 1.20017400  | -0.93709200 | 1.79138100  |
| H | -2.69719700 | -1.51238800 | 0.40541000  |
| H | 1.96150500  | -2.39631600 | -0.58877300 |
| C | 5.39506600  | -8.14705800 | -0.91263800 |
| C | 6.41485600  | -7.17699700 | -0.27371400 |
| C | 6.14280200  | -5.66946400 | -0.50921200 |
| C | 6.37036900  | -5.17371800 | -1.95198800 |
| O | 7.07761200  | -5.83795500 | -2.73028500 |
| O | 5.84194400  | -4.08452000 | -2.32232800 |
| C | 4.00810000  | -7.53946700 | -0.79463100 |
| O | 3.52402900  | -6.92201600 | -1.73754500 |
| N | 3.35152100  | -7.72224300 | 0.33942000  |
| C | 2.11509500  | -6.99237200 | 0.59633600  |
| C | 0.90473900  | -7.74385100 | -0.03054400 |
| O | -0.20218500 | -6.83380200 | -0.14169300 |
| C | 0.49777300  | -8.98438700 | 0.78402700  |
| C | 1.93678000  | -6.74518400 | 2.10035400  |
| O | 2.41475500  | -7.52332700 | 2.92586900  |
| N | 1.23560400  | -5.65402700 | 2.43223400  |
| C | 0.93481400  | -5.29770900 | 3.81983200  |
| C | -0.55594600 | -5.37719500 | 4.04445300  |
| O | -1.04602100 | -6.24073200 | 4.80428500  |
| N | -1.28639200 | -4.45214000 | 3.43260900  |
| C | -2.75324400 | -4.49823200 | 3.45725100  |
| C | -3.35398100 | -3.20386400 | 2.91003500  |
| C | -3.31085300 | -5.69530800 | 2.71757200  |
| O | -4.47704800 | -6.04604900 | 2.89361000  |
| N | -2.48830200 | -6.33330800 | 1.87679600  |
| C | -2.98672600 | -7.40226300 | 1.01973900  |
| C | -3.61419400 | -6.92928500 | -0.29943500 |
| O | -4.04065700 | -7.76799100 | -1.11983400 |
| N | -3.69155900 | -5.61656000 | -0.53067600 |
| C | -4.28455100 | -5.07604600 | -1.75684400 |
| C | -4.76868800 | -3.64050400 | -1.57864000 |
| C | -5.97850300 | -3.53686300 | -0.65082700 |

|   |             |             |             |
|---|-------------|-------------|-------------|
| C | -7.19438800 | -4.25530100 | -1.21948400 |
| O | -7.95129600 | -4.89143200 | -0.48733500 |
| N | -7.40774100 | -4.12368500 | -2.52824600 |
| C | -3.30694700 | -5.17790500 | -2.92397800 |
| O | -3.69260600 | -5.51403400 | -4.03806700 |
| N | -2.02467400 | -4.93235100 | -2.64622400 |
| C | -1.01527300 | -5.20030100 | -3.66360300 |
| C | 0.33028000  | -4.61862400 | -3.26390100 |
| C | 1.37136400  | -4.83877300 | -4.32463400 |
| N | 1.28090300  | -4.30605400 | -5.58003200 |
| C | 2.32957100  | -4.72839600 | -6.30271700 |
| N | 3.07299900  | -5.53408700 | -5.53945100 |
| C | 2.50088800  | -5.62639200 | -4.31626700 |
| C | -0.87989100 | -6.67476000 | -3.95504500 |
| O | -0.73624600 | -7.07314700 | -5.12483000 |
| N | -0.96179900 | -7.51028800 | -2.90443700 |
| H | 7.42578100  | -7.42333000 | -0.65206900 |
| H | 6.44356100  | -7.35373000 | 0.82092100  |
| H | 5.11981200  | -5.40550800 | -0.17222500 |
| H | 6.82480000  | -5.09684200 | 0.16652100  |
| H | 5.46276100  | -9.14441100 | -0.43863500 |
| H | 1.16671000  | -8.06189700 | -1.07033400 |
| H | -0.30570000 | -9.53670600 | 0.27667100  |
| H | 1.34998500  | -9.66370200 | 0.90301500  |
| H | 0.13338800  | -8.72001300 | 1.78548300  |
| H | 0.13834900  | -5.92614200 | -0.22770500 |
| H | 2.20255700  | -5.99384200 | 0.06513700  |
| H | 3.84720100  | -8.08001800 | 1.12973900  |
| H | 1.47341500  | -5.96946200 | 4.53393600  |
| H | 1.32590800  | -4.27343500 | 4.03247100  |
| H | 0.98202900  | -4.97510700 | 1.69919600  |
| H | -4.45227900 | -3.24706400 | 2.95346000  |
| H | -3.07700000 | -3.02747700 | 1.85684600  |
| H | -3.03414000 | -2.32621500 | 3.49216300  |
| H | -3.05161500 | -4.59770100 | 4.53860600  |
| H | -0.86512000 | -3.76879200 | 2.82451800  |
| H | -3.73590700 | -8.01569000 | 1.56414400  |
| H | -2.13773600 | -8.08412900 | 0.78763500  |
| H | -1.62323700 | -5.91923600 | 1.58564700  |
| H | -5.00732100 | -3.21332100 | -2.58212700 |
| H | -3.94790600 | -2.99854700 | -1.18247800 |
| H | -5.73459800 | -3.94276500 | 0.35459800  |
| H | -6.20193300 | -2.45084800 | -0.46978700 |
| H | -8.03557900 | -4.75026800 | -2.97915800 |
| H | -6.64278800 | -3.81118200 | -3.09375500 |



|   |              |             |             |
|---|--------------|-------------|-------------|
| H | -5.17072400  | -5.72349900 | -2.00785300 |
| H | -3.07113000  | -4.96040300 | -0.04545400 |
| H | 0.70785300   | -5.04866200 | -2.30911200 |
| H | 0.23419500   | -3.52495800 | -3.07968900 |
| H | 2.92715200   | -6.18375200 | -3.44948000 |
| H | 3.91719000   | -5.97295700 | -5.80293500 |
| H | 2.51131700   | -4.42808500 | -7.34012400 |
| H | -1.34008300  | -4.68858700 | -4.61617400 |
| H | -1.72083300  | -4.51627900 | -1.74574900 |
| H | -1.19679902  | -6.99078332 | -2.08292018 |
| H | 5.64681200   | -8.29149500 | -1.98165300 |
| C | -10.60779400 | -2.79848300 | -4.35970200 |
| C | -9.61102200  | -1.73599200 | -3.93315300 |
| O | -9.80558500  | -1.12664500 | -2.89423400 |
| N | -8.58054000  | -1.48566600 | -4.74496000 |
| C | -7.61116200  | -0.41718900 | -4.43405500 |
| C | -6.62428300  | -0.85139700 | -3.35642300 |
| C | -6.85340500  | 0.02204200  | -5.66831300 |
| O | -6.82569200  | -0.69628400 | -6.66809200 |
| N | -6.21718500  | 1.18403600  | -5.55091300 |
| C | -5.38394900  | 1.77016100  | -6.63080200 |
| C | -4.80517400  | 3.11205900  | -6.14003200 |
| C | -3.71355000  | 2.94313900  | -5.14694400 |
| N | -3.96488100  | 2.50309000  | -3.88340300 |
| C | -2.80142400  | 2.40794200  | -3.22407700 |
| N | -1.80500600  | 2.71915700  | -4.07779000 |
| C | -2.33931900  | 3.02824400  | -5.27671000 |
| C | -4.26187300  | 0.83748000  | -7.05279000 |
| O | -3.72173800  | 0.96868600  | -8.15681100 |
| N | -3.86771200  | -0.08571600 | -6.16833400 |
| C | -2.71705500  | -1.00858700 | -6.41947900 |
| C | -2.56389200  | -2.05305800 | -5.29535300 |
| C | -2.22727000  | -1.41768600 | -3.95064000 |
| C | -0.83955700  | -0.76338600 | -3.90692400 |
| C | -0.47734800  | -0.43442600 | -2.45655600 |
| N | 0.90365900   | 0.08452500  | -2.22262600 |
| C | -2.86172300  | -1.73642600 | -7.74653200 |
| O | -1.83880200  | -2.02936400 | -8.41833500 |
| H | -10.17400700 | -3.80449600 | -4.28018800 |
| H | -11.49637600 | -2.76558000 | -3.70201100 |
| H | -7.12608600  | -1.37600200 | -2.52824700 |
| H | -5.84229700  | -1.52280600 | -3.74652200 |
| H | -6.11945700  | 0.02109200  | -2.89846300 |
| H | -8.22244800  | 0.44020000  | -4.02770100 |
| H | -8.34715800  | -2.13478100 | -5.46675200 |

|   |              |             |             |
|---|--------------|-------------|-------------|
| H | -4.40491500  | 3.66374700  | -7.01437400 |
| H | -5.60712400  | 3.75240900  | -5.71598000 |
| H | -1.75370800  | 3.31597700  | -6.15428400 |
| H | -0.84531400  | 2.81349500  | -3.82541100 |
| H | -2.70353500  | 2.15514400  | -2.15663200 |
| H | -6.04286300  | 1.95579400  | -7.51728400 |
| H | -6.36177000  | 1.74803100  | -4.71348900 |
| H | -3.49304700  | -2.65216100 | -5.19122300 |
| H | -1.76405000  | -2.77217700 | -5.57959100 |
| H | -2.29285000  | -2.20005000 | -3.16433300 |
| H | -3.00451600  | -0.66562300 | -3.68578800 |
| H | -0.08430900  | -1.44961500 | -4.35085700 |
| H | -0.81753500  | 0.15060300  | -4.53536800 |
| H | -0.59899900  | -1.36325500 | -1.84690000 |
| H | -1.21311500  | 0.28756000  | -2.03116000 |
| H | 1.50305400   | -0.16525000 | -2.99936600 |
| H | 1.27342800   | -0.37125800 | -1.35972000 |
| H | 0.96821300   | 1.11963200  | -2.07481600 |
| H | -1.77187400  | -0.39464300 | -6.46391800 |
| H | -4.00192200  | 0.07708100  | -5.18581600 |
| N | -4.19632700  | -2.09853600 | -8.24444700 |
| H | -4.17923300  | -2.80531800 | -8.94307800 |
| H | -4.83703500  | -2.29953600 | -7.50465300 |
| H | -10.94966700 | -2.65924900 | -5.39285700 |
| C | -1.12780000  | -2.47151800 | 7.61431100  |
| C | -0.46836900  | -1.84175600 | 6.39204400  |
| O | 0.75814500   | -1.95771000 | 6.23455900  |
| N | -1.23069600  | -1.16185100 | 5.53238700  |
| C | -0.65454800  | -0.60634000 | 4.31575600  |
| C | 0.20684200   | 0.62339600  | 4.53067500  |
| O | 0.95294300   | 1.01790900  | 3.62462500  |
| N | 0.07773600   | 1.25548800  | 5.70634800  |
| C | 0.92826100   | 2.38196500  | 6.04121400  |
| C | 0.09319300   | 3.49935800  | 6.67581500  |
| C | -1.08528500  | 4.05362900  | 5.83559300  |
| C | -1.70932800  | 5.23154400  | 6.59850000  |
| C | -0.75194000  | 4.42552400  | 4.39261900  |
| C | 2.10275400   | 2.06535400  | 6.96081700  |
| O | 2.96201100   | 2.93614800  | 7.20801800  |
| N | 2.13895100   | 0.82660600  | 7.44983300  |
| C | 6.16358700   | 0.97069700  | 5.34760300  |
| C | 7.37382700   | 0.80390900  | 4.46858000  |
| C | 8.05172300   | -0.41286700 | 4.41408300  |
| C | 9.16488400   | -0.56990300 | 3.59149000  |
| C | 9.58436700   | 0.48366000  | 2.78142800  |

|   |             |             |             |
|---|-------------|-------------|-------------|
| C | 8.89861800  | 1.69235500  | 2.80651400  |
| C | 7.78122700  | 1.84059600  | 3.63809500  |
| H | -0.41899915 | -2.52513453 | 8.41407760  |
| H | -0.04244800 | -1.37642600 | 3.78727300  |
| H | -1.47786300 | -0.34335500 | 3.61020500  |
| H | -2.24569600 | -1.07744000 | 5.60815500  |
| H | -0.31092700 | 3.16544300  | 7.65434500  |
| H | 0.77851200  | 4.34275900  | 6.90673100  |
| H | -1.87297500 | 3.24546100  | 5.76199200  |
| H | -2.61062200 | 5.59818500  | 6.08690900  |
| H | -1.99826900 | 4.93880600  | 7.61545300  |
| H | -1.00790800 | 6.07207200  | 6.67872200  |
| H | -1.61815400 | 4.91914300  | 3.91469200  |
| H | -0.50741700 | 3.55041700  | 3.75952600  |
| H | 0.10074100  | 5.11615700  | 4.34548400  |
| H | 1.38245900  | 2.80027800  | 5.09222600  |
| H | -0.72390400 | 1.10607500  | 6.28299100  |
| H | 1.50716994  | 0.13343585  | 7.10289233  |
| H | 5.46103187  | 0.19110063  | 5.13892673  |
| H | 5.71036776  | 1.92045561  | 5.15408062  |
| H | 7.21805100  | 2.78624900  | 3.62383900  |
| H | 7.69016500  | -1.25971400 | 5.01323900  |
| H | 9.20562200  | 2.51970500  | 2.15965000  |
| H | 9.66973300  | -1.54084300 | 3.53907300  |
| H | 10.44056000 | 0.34881800  | 2.11010100  |
| H | -1.96237352 | -1.87413153 | 7.91682785  |
| C | 7.33175200  | -4.01098400 | -6.09637800 |
| C | 6.02749100  | -3.19516800 | -6.06148000 |
| O | 5.54593200  | -2.69815500 | -7.09437300 |
| N | 5.46861100  | -3.05457800 | -4.86229900 |
| C | 4.09558300  | -2.55462200 | -4.71844100 |
| C | 3.91182400  | -1.09959100 | -4.38154300 |
| O | 2.79453900  | -0.65834900 | -4.13915100 |
| N | 4.99556700  | -0.33247100 | -4.40788600 |
| C | 4.89618300  | 1.08686400  | -4.06086200 |
| C | 4.99594300  | 1.29245600  | -2.52718500 |
| O | 4.57209100  | 2.64078200  | -2.21544900 |
| C | 6.42822100  | 1.11827500  | -2.03053800 |
| C | 5.94832400  | 1.92039000  | -4.80803800 |
| O | 6.84854000  | 1.34967100  | -5.43779600 |
| N | 5.82717300  | 3.25505200  | -4.73929900 |
| H | 7.38175841  | -4.64072351 | -5.23276494 |
| H | 3.51644300  | -2.72914200 | -5.65552800 |
| H | 3.60705700  | -3.15831600 | -3.91745200 |
| H | 5.83731000  | -3.52964700 | -4.01341500 |

|   |             |             |             |
|---|-------------|-------------|-------------|
| H | 4.32135800  | 0.56959000  | -2.00222700 |
| H | 6.90869600  | 0.23412700  | -2.47672600 |
| H | 6.43651100  | 0.97012000  | -0.93723100 |
| H | 7.08101000  | 1.98520000  | -2.23302000 |
| H | 3.62314100  | 2.57970200  | -1.98878200 |
| H | 3.88630500  | 1.47264200  | -4.39917000 |
| H | 5.92415500  | -0.70528200 | -4.53106100 |
| H | 5.29227331  | 3.67134621  | -4.00405656 |
| H | 7.35132260  | -4.61465746 | -6.97960806 |
| C | -2.11510000 | 8.85223600  | 2.47837300  |
| C | -2.82916100 | 7.70297200  | 3.15402500  |
| S | -3.19231500 | 6.30985500  | 2.09858400  |
| C | -0.81914200 | 8.35315200  | 1.83260200  |
| O | -0.70894400 | 8.21217900  | 0.60700100  |
| N | 0.19279600  | 8.16836600  | 2.66582100  |
| C | 1.55315500  | 7.79329600  | 2.24295900  |
| C | 2.53949200  | 8.99324900  | 2.34510900  |
| C | 3.91013600  | 8.56667700  | 1.81614600  |
| C | 2.04905900  | 10.18714900 | 1.54851700  |
| C | 2.02549700  | 6.59063000  | 3.05984700  |
| O | 2.39120100  | 6.71155100  | 4.24058200  |
| N | 2.04866800  | 5.42035100  | 2.41503800  |
| C | 2.62785100  | 4.18735700  | 2.99793200  |
| C | 4.03217800  | 4.08944000  | 2.44147900  |
| O | 5.00451100  | 4.29144000  | 3.12894500  |
| N | 4.14458600  | 3.77446500  | 1.17660000  |
| C | 5.42324600  | 3.91438100  | 0.47683200  |
| C | 5.37748500  | 5.07769000  | -0.51605100 |
| O | 6.41669300  | 5.57605900  | -0.95279600 |
| N | 4.17577600  | 5.49312500  | -0.94580000 |
| C | 4.03273300  | 6.69159400  | -1.80050500 |
| C | 3.32693800  | 6.51982900  | -3.12344000 |
| O | 3.23001300  | 7.48815100  | -3.87010000 |
| N | 2.79596400  | 5.31989100  | -3.44565500 |
| C | 2.27115000  | 5.17126000  | -4.81565300 |
| C | 2.16958500  | 3.71249900  | -5.26737200 |
| O | 1.20898300  | 3.00032000  | -4.53283000 |
| C | 0.92978200  | 5.87939100  | -5.08344200 |
| O | 0.77098700  | 6.55195200  | -6.12019700 |
| N | -0.05554300 | 5.72720600  | -4.20240100 |
| C | -1.32839300 | 6.40345000  | -4.48516600 |
| C | -2.48890400 | 5.91814900  | -3.57461500 |
| C | -2.59162200 | 6.68684800  | -2.23679900 |
| O | -3.30831100 | 7.69334700  | -2.16421600 |
| N | -1.96382500 | 6.17671300  | -1.17461300 |

|   |             |             |             |
|---|-------------|-------------|-------------|
| C | -1.14558100 | 7.91403600  | -4.43767800 |
| O | -1.78423100 | 8.64451900  | -5.21097700 |
| N | -0.30577100 | 8.37552400  | -3.49452100 |
| H | -3.78527300 | 8.08446600  | 3.57101800  |
| H | -2.25114900 | 7.37096900  | 4.04310100  |
| H | -3.05552300 | 5.28515700  | 2.98375100  |
| H | -1.92110400 | 9.66549400  | 3.20560100  |
| H | 2.64627900  | 9.28200700  | 3.41918700  |
| H | 3.85863800  | 8.26510100  | 0.75844000  |
| H | 4.63132100  | 9.39107200  | 1.88723100  |
| H | 4.31771300  | 7.72179400  | 2.38675600  |
| H | 1.85014400  | 9.92559500  | 0.49648100  |
| H | 2.79755400  | 10.99116600 | 1.54763600  |
| H | 1.12340700  | 10.61046500 | 1.96035800  |
| H | 1.50431700  | 7.52337700  | 1.14317900  |
| H | 0.05814600  | 8.27528700  | 3.64864600  |
| H | 1.98665500  | 3.31998200  | 2.71864500  |
| H | 2.63114300  | 4.22057400  | 4.11084500  |
| H | 1.75346200  | 5.32644300  | 1.42798200  |
| H | 5.64225400  | 2.96985000  | -0.07202000 |
| H | 6.26881000  | 4.05559300  | 1.18423100  |
| H | 3.32608100  | 3.63648700  | 0.59825900  |
| H | 5.03699000  | 7.13423200  | -2.00280000 |
| H | 3.47472800  | 7.45496800  | -1.20510400 |
| H | 3.27680900  | 5.10266800  | -0.59733400 |
| H | 1.92429600  | 3.68738900  | -6.34881600 |
| H | 3.14456300  | 3.18754900  | -5.13779600 |
| H | 1.06502100  | 2.19629000  | -5.04649400 |
| H | 3.03269000  | 5.64312200  | -5.49874300 |
| H | 2.53753500  | 4.63425400  | -2.75974500 |
| H | -2.40979500 | 4.83871200  | -3.36049600 |
| H | -3.43933000 | 6.05897900  | -4.12663600 |
| H | -1.28454700 | 5.41653600  | -1.29560800 |
| H | -2.01765100 | 6.63437400  | -0.29041900 |
| H | -1.63014900 | 6.12774000  | -5.53312100 |
| H | 0.00158600  | 5.12198400  | -3.35092200 |
| H | -0.42467302 | 7.84621614  | -2.65446416 |
| H | -2.76609600 | 9.29405500  | 1.69319000  |
| C | -7.24332200 | 4.71719100  | -2.33572000 |
| C | -5.83533900 | 4.80564600  | -1.72522600 |
| O | -5.89897900 | 4.55526300  | -0.32836200 |
| C | -7.78108800 | 3.29471700  | -2.35724200 |
| O | -7.41647600 | 2.51760700  | -3.25239800 |
| N | -8.62070600 | 2.91878800  | -1.37910200 |
| C | -9.19692900 | 1.56882000  | -1.36022900 |

|   |              |             |             |
|---|--------------|-------------|-------------|
| C | -10.45868800 | 1.46085700  | -0.54645500 |
| O | -10.82144400 | 2.40587200  | 0.15246500  |
| N | -11.14325200 | 0.32530900  | -0.68921800 |
| H | -5.12776200  | 4.12116500  | -2.23040100 |
| H | -5.44483400  | 5.83781300  | -1.80638800 |
| H | -7.19393000  | 5.09381500  | -3.37657800 |
| H | -9.37384700  | 1.25003700  | -2.41500000 |
| H | -8.44343000  | 0.84949700  | -0.95046500 |
| H | -8.67461000  | 3.45735900  | -0.52831800 |
| H | -10.51233399 | -0.45003366 | -0.66117826 |
| H | -7.93117000  | 5.40248800  | -1.79842100 |
| H | -5.64974800  | 3.63016100  | -0.19202000 |
| C | -7.54879700  | -3.84178100 | 2.82150500  |
| C | -7.16105000  | -2.37380500 | 2.98428000  |
| N | -6.81861300  | -2.02524000 | 4.39642800  |
| H | -7.96571185  | -3.99472631 | 1.84801142  |
| H | -6.67983719  | -4.45520905 | 2.93775849  |
| H | -7.97565500  | -1.70142300 | 2.61914800  |
| H | -6.28590100  | -2.14665300 | 2.32439700  |
| H | -7.64181000  | -2.02864900 | 4.96461400  |
| H | -6.36253100  | -1.06213900 | 4.41725000  |
| H | -6.16578600  | -2.69653600 | 4.75799100  |
| C | -5.12147700  | 3.65263100  | 4.90518500  |
| C | -4.46230000  | 2.94414400  | 3.70307000  |
| C | -3.63182500  | 1.68872100  | 4.04225200  |
| C | -4.46105100  | 0.45795200  | 4.44673100  |
| O | -5.66079800  | 0.39836200  | 4.08023200  |
| O | -3.93287700  | -0.45839500 | 5.13039300  |
| C | -5.72645400  | 4.98539700  | 4.41491800  |
| O | -5.32206800  | 6.07223000  | 4.86240300  |
| N | -6.73937900  | 4.88699700  | 3.54444600  |
| C | -7.41520000  | 6.02307000  | 2.90844900  |
| C | -8.52029300  | 5.51739900  | 1.97701800  |
| O | -8.06229900  | 4.40206500  | 1.19719100  |
| C | -8.06395000  | 6.89840700  | 3.98141900  |
| O | -8.16195300  | 8.14044700  | 3.80571300  |
| H | -5.23450800  | 2.66986500  | 2.95494500  |
| H | -3.78290800  | 3.67800300  | 3.20174400  |
| H | -3.03139200  | 1.41173700  | 3.14774400  |
| H | -2.89872100  | 1.95043100  | 4.84209000  |
| H | -4.36615000  | 3.84704300  | 5.69314100  |
| H | -9.38602700  | 5.09897100  | 2.52090500  |
| H | -8.87707400  | 6.33456200  | 1.32286800  |
| H | -6.66154700  | 6.63248600  | 2.33666500  |
| H | -6.87991500  | 3.99152300  | 3.11185900  |

|   |              |             |             |
|---|--------------|-------------|-------------|
| N | -8.57349500  | 6.28921500  | 5.21826300  |
| H | -8.10099900  | 5.45536500  | 5.48345900  |
| H | -8.62304700  | 6.94344500  | 5.96697500  |
| H | -5.89881000  | 3.01439500  | 5.36638700  |
| H | -7.35157200  | 4.72912400  | 0.63595700  |
| C | -9.73754400  | 1.34911100  | 3.67370600  |
| C | -8.63584000  | 1.18793600  | 2.63335200  |
| C | -9.23931500  | 2.24456200  | 4.83091000  |
| O | -9.37039300  | 3.49426200  | 4.76107900  |
| H | -8.32609800  | 2.15857400  | 2.21882500  |
| H | -8.97600200  | 0.56949300  | 1.78994200  |
| H | -7.73917600  | 0.70978400  | 3.04964400  |
| H | -10.05804600 | 0.36396500  | 4.06168200  |
| N | -8.61202200  | 1.63613700  | 6.01299200  |
| H | -8.05448200  | 0.85695700  | 5.73480900  |
| H | -8.07349200  | 2.29509500  | 6.53333000  |
| H | -10.63017100 | 1.81448800  | 3.21392700  |
| C | 4.89354400   | -3.55337600 | 5.27712300  |
| C | 4.85194700   | -3.06613500 | 3.86667800  |
| C | 4.50409300   | -4.19703900 | 2.92550700  |
| C | 3.76829200   | -1.99839000 | 3.92794200  |
| H | 3.89512749   | -3.68927937 | 5.63711570  |
| H | 5.39821484   | -2.83441057 | 5.88810259  |
| H | 5.82290300   | -2.61278100 | 3.54977700  |
| H | 3.48719400   | -1.64277300 | 2.92387200  |
| H | 2.85181100   | -2.36383800 | 4.41829700  |
| H | 4.12924600   | -1.11547700 | 4.48914700  |
| H | 5.34502900   | -4.89624700 | 2.80761300  |
| H | 3.64074100   | -4.77448000 | 3.28608500  |
| H | 4.25507500   | -3.81733900 | 1.92171800  |
| O | 0.79376400   | 1.02002900  | -6.55599700 |
| O | -4.92465800  | 8.23320100  | -0.04652300 |
| O | -5.88929300  | -3.84679400 | -5.30282200 |
| O | 1.02763800   | 7.16836200  | -1.27431000 |
| O | 0.49953500   | -1.87111700 | -6.77322700 |
| O | 3.32691600   | -7.52125900 | 5.45288100  |
| O | -8.57869700  | -1.64945700 | -0.16120300 |
| O | 2.41973700   | -3.78428300 | 7.68434200  |
| H | 0.67802500   | 0.06457000  | -6.44598500 |
| H | 1.48172400   | 1.14580800  | -7.20063400 |
| H | -4.68390100  | 7.48569600  | 0.49811000  |
| H | -4.37987000  | 8.19920800  | -0.84021800 |
| H | -5.17744400  | -4.43061800 | -5.02646000 |
| H | -5.53128200  | -3.19588000 | -5.90274900 |
| H | 1.15265100   | 6.23215300  | -1.02234500 |

|   |              |             |             |
|---|--------------|-------------|-------------|
| H | 0.59566700   | 7.60877200  | -0.53108700 |
| H | 0.72385100   | -2.69230600 | -6.31040500 |
| H | -0.22044600  | -2.04072800 | -7.38869800 |
| H | 4.11336200   | -7.85298000 | 5.03275400  |
| H | 2.70621600   | -7.29744300 | 4.74414200  |
| H | -7.64051600  | -1.45555200 | -0.24043400 |
| H | -8.83948600  | -2.18861800 | -0.90035100 |
| H | 2.79530000   | -3.36841600 | 8.45687100  |
| H | 2.67805100   | -3.27525400 | 6.91729000  |
| H | 8.16909571   | -3.34485046 | -6.10102739 |
| H | 6.27179026   | 3.83335575  | -5.42331674 |
| H | -0.50527031  | 9.33843246  | -3.31284185 |
| H | -11.80793011 | 0.24120699  | 0.05316321  |
| H | -8.27254022  | -4.10403333 | 3.56468699  |
| H | -1.66823906  | -8.19634083 | -3.07843113 |
| H | 6.45895450   | 0.91911087  | 6.37473343  |
| H | 5.41710506   | -4.48567674 | 5.31711233  |
| H | -1.46473384  | -3.45717644 | 7.36966222  |
| H | 2.79790148   | 0.58997367  | 8.16382839  |

## 2.3 2AP coenzyme/substrate in a 7 Å protein cluster.

615

2AP surrounded by a 7 Ang cut of tryptophan synthase

|   |           |           |           |
|---|-----------|-----------|-----------|
| O | 3.891392  | -3.220755 | -0.725068 |
| C | 4.310711  | -2.075858 | -0.116111 |
| C | 5.645943  | -1.823861 | 0.228945  |
| C | 5.977446  | -0.626483 | 0.880147  |
| C | 4.979548  | 0.314007  | 1.143125  |
| C | 3.650188  | 0.069253  | 0.773100  |
| C | 3.302772  | -1.139979 | 0.169234  |
| N | 1.944591  | -1.482886 | -0.122198 |
| O | 1.615698  | 4.718715  | -0.209624 |
| P | 0.900404  | 3.566888  | -0.962364 |
| O | 1.854691  | 2.536140  | -1.599124 |
| O | -0.213032 | 4.109356  | -1.877248 |
| O | 0.161834  | 2.573427  | 0.167627  |
| C | -0.927718 | 3.036275  | 0.951474  |
| C | -2.194024 | 2.247409  | 0.689015  |
| C | -3.385049 | 2.932374  | 0.494501  |
| N | -4.579713 | 2.361219  | 0.268415  |
| C | -2.241361 | 0.828016  | 0.669102  |



|   |           |           |           |
|---|-----------|-----------|-----------|
| C | -3.506564 | 0.220348  | 0.372756  |
| O | -3.646114 | -1.119623 | 0.256136  |
| C | -4.631642 | 1.022022  | 0.190367  |
| C | -5.969095 | 0.398403  | -0.147458 |
| C | -1.075168 | 0.015740  | 0.863988  |
| N | -1.206247 | -1.290857 | 0.742094  |
| C | -0.238571 | -2.210191 | 0.810519  |
| C | -0.512045 | -3.524336 | 0.256375  |
| O | -1.697169 | -3.822446 | -0.143558 |
| O | 0.506022  | -4.309608 | 0.148847  |
| C | 1.171187  | -1.823699 | 1.143105  |
| H | 4.637150  | -3.641851 | -1.218106 |
| H | 6.409962  | -2.581591 | 0.006514  |
| H | 7.011173  | -0.440448 | 1.187817  |
| H | 5.233305  | 1.248173  | 1.645438  |
| H | 2.883587  | 0.816571  | 0.925837  |
| H | -0.636022 | 2.955638  | 2.028168  |
| H | -1.123414 | 4.099876  | 0.744307  |
| H | -3.370981 | 4.032872  | 0.531222  |
| H | -5.984128 | -0.691259 | 0.043910  |
| H | -6.202953 | 0.540554  | -1.224387 |
| H | -6.771955 | 0.888844  | 0.431277  |
| H | -0.129746 | 0.497025  | 1.105969  |
| H | 1.673893  | -2.656883 | 1.658707  |
| H | 1.200174  | -0.937092 | 1.791381  |
| H | -2.697197 | -1.512388 | 0.405410  |
| H | 1.961505  | -2.396316 | -0.588773 |
| C | 5.395066  | -8.147058 | -0.912638 |
| C | 6.414856  | -7.176997 | -0.273714 |
| C | 6.142802  | -5.669464 | -0.509212 |
| C | 6.370369  | -5.173718 | -1.951988 |
| O | 7.077612  | -5.837955 | -2.730285 |
| O | 5.841944  | -4.084520 | -2.322328 |
| C | 4.008100  | -7.539467 | -0.794631 |
| O | 3.524029  | -6.922016 | -1.737545 |
| N | 3.351521  | -7.722243 | 0.339420  |
| C | 2.115095  | -6.992372 | 0.596336  |
| C | 0.904739  | -7.743851 | -0.030544 |
| O | -0.202185 | -6.833802 | -0.141693 |
| C | 0.497773  | -8.984387 | 0.784027  |
| C | 1.936780  | -6.745184 | 2.100354  |
| O | 2.414755  | -7.523327 | 2.925869  |
| N | 1.235604  | -5.654027 | 2.432234  |
| C | 0.934814  | -5.297709 | 3.819832  |
| C | -0.555946 | -5.377195 | 4.044453  |

|   |           |            |           |
|---|-----------|------------|-----------|
| O | -1.046021 | -6.240732  | 4.804285  |
| N | -1.286392 | -4.452140  | 3.432609  |
| C | -2.753244 | -4.498232  | 3.457251  |
| C | -3.353981 | -3.203864  | 2.910035  |
| C | -3.310853 | -5.695308  | 2.717572  |
| O | -4.477048 | -6.046049  | 2.893610  |
| N | -2.488302 | -6.333308  | 1.876796  |
| C | -2.986726 | -7.402263  | 1.019739  |
| C | -3.614194 | -6.929285  | -0.299435 |
| O | -4.040657 | -7.767991  | -1.119834 |
| N | -3.691559 | -5.616560  | -0.530676 |
| C | -4.284551 | -5.076046  | -1.756844 |
| C | -4.768688 | -3.640504  | -1.578640 |
| C | -5.978503 | -3.536863  | -0.650827 |
| C | -7.194388 | -4.255301  | -1.219484 |
| O | -7.951296 | -4.891432  | -0.487335 |
| N | -7.407741 | -4.123685  | -2.528246 |
| C | -3.306947 | -5.177905  | -2.923978 |
| O | -3.692606 | -5.514034  | -4.038067 |
| N | -2.024674 | -4.932351  | -2.646224 |
| C | -1.015273 | -5.200301  | -3.663603 |
| C | 0.330280  | -4.618624  | -3.263901 |
| C | 1.371364  | -4.838773  | -4.324634 |
| N | 1.280903  | -4.306054  | -5.580032 |
| C | 2.329571  | -4.728396  | -6.302717 |
| N | 3.072999  | -5.534087  | -5.539451 |
| C | 2.500888  | -5.626392  | -4.316267 |
| C | -0.879891 | -6.674760  | -3.955045 |
| O | -0.736246 | -7.073147  | -5.124830 |
| N | -0.961799 | -7.510288  | -2.904437 |
| C | -0.971233 | -8.993575  | -3.039451 |
| C | -2.157166 | -9.453838  | -3.886155 |
| O | -1.989284 | -10.214384 | -4.847027 |
| N | -3.357302 | -8.962967  | -3.555851 |
| C | -4.550328 | -9.258427  | -4.369237 |
| C | -5.836750 | -8.660120  | -3.723357 |
| C | -6.980991 | -8.562065  | -4.741132 |
| C | -6.244994 | -9.496239  | -2.501122 |
| C | -4.380470 | -8.813228  | -5.831675 |
| O | -4.660153 | -9.606936  | -6.767283 |
| H | 7.425781  | -7.423330  | -0.652069 |
| H | 6.443561  | -7.353730  | 0.820921  |
| H | 5.119812  | -5.405508  | -0.172225 |
| H | 6.824800  | -5.096842  | 0.166521  |
| H | 5.462761  | -9.144411  | -0.438635 |

|   |           |            |           |
|---|-----------|------------|-----------|
| H | 1.166710  | -8.061897  | -1.070334 |
| H | -0.305700 | -9.536706  | 0.276671  |
| H | 1.349985  | -9.663702  | 0.903015  |
| H | 0.133388  | -8.720013  | 1.785483  |
| H | 0.138349  | -5.926142  | -0.227705 |
| H | 2.202557  | -5.993842  | 0.065137  |
| H | 3.847201  | -8.080018  | 1.129739  |
| H | 1.473415  | -5.969462  | 4.533936  |
| H | 1.325908  | -4.273435  | 4.032471  |
| H | 0.982029  | -4.975107  | 1.699196  |
| H | -4.452279 | -3.247064  | 2.953460  |
| H | -3.077000 | -3.027477  | 1.856846  |
| H | -3.034140 | -2.326215  | 3.492163  |
| H | -3.051615 | -4.597701  | 4.538606  |
| H | -0.865120 | -3.768792  | 2.824518  |
| H | -3.735907 | -8.015690  | 1.564144  |
| H | -2.137736 | -8.084129  | 0.787635  |
| H | -1.623237 | -5.919236  | 1.585647  |
| H | -5.007321 | -3.213321  | -2.582127 |
| H | -3.947906 | -2.998547  | -1.182478 |
| H | -5.734598 | -3.942765  | 0.354598  |
| H | -6.201933 | -2.450848  | -0.469787 |
| H | -8.035579 | -4.750268  | -2.979158 |
| H | -6.642788 | -3.811182  | -3.093755 |
| H | -5.170724 | -5.723499  | -2.007853 |
| H | -3.071130 | -4.960403  | -0.045454 |
| H | 0.707853  | -5.048662  | -2.309112 |
| H | 0.234195  | -3.524958  | -3.079689 |
| H | 2.927152  | -6.183752  | -3.449480 |
| H | 3.917190  | -5.972957  | -5.802935 |
| H | 2.511317  | -4.428085  | -7.340124 |
| H | -1.340083 | -4.688587  | -4.616174 |
| H | -1.720833 | -4.516279  | -1.745749 |
| H | -0.022426 | -9.347733  | -3.494204 |
| H | -1.021651 | -9.430164  | -2.020343 |
| H | -0.737650 | -7.173454  | -1.969121 |
| H | -5.613212 | -7.618888  | -3.371274 |
| H | -7.202957 | -9.536713  | -5.194429 |
| H | -7.897785 | -8.206202  | -4.253870 |
| H | -6.740868 | -7.861217  | -5.550739 |
| H | -5.412248 | -9.647474  | -1.803745 |
| H | -6.609682 | -10.488061 | -2.801835 |
| H | -7.053610 | -9.001398  | -1.948449 |
| H | -4.670023 | -10.375333 | -4.387974 |
| H | -3.490321 | -8.383321  | -2.732006 |

|   |            |           |           |
|---|------------|-----------|-----------|
| N | -3.890789  | -7.460915 | -6.135587 |
| H | -3.564004  | -6.948522 | -5.332213 |
| H | -3.259661  | -7.441448 | -6.902796 |
| H | 5.646812   | -8.291495 | -1.981653 |
| C | -10.607794 | -2.798483 | -4.359702 |
| C | -9.611022  | -1.735992 | -3.933153 |
| O | -9.805585  | -1.126645 | -2.894234 |
| N | -8.580540  | -1.485666 | -4.744960 |
| C | -7.611162  | -0.417189 | -4.434055 |
| C | -6.624283  | -0.851397 | -3.356423 |
| C | -6.853405  | 0.022042  | -5.668313 |
| O | -6.825692  | -0.696284 | -6.668092 |
| N | -6.217185  | 1.184036  | -5.550913 |
| C | -5.383949  | 1.770161  | -6.630802 |
| C | -4.805174  | 3.112059  | -6.140032 |
| C | -3.713550  | 2.943139  | -5.146944 |
| N | -3.964881  | 2.503090  | -3.883403 |
| C | -2.801424  | 2.407942  | -3.224077 |
| N | -1.805006  | 2.719157  | -4.077790 |
| C | -2.339319  | 3.028244  | -5.276710 |
| C | -4.261873  | 0.837480  | -7.052790 |
| O | -3.721738  | 0.968686  | -8.156811 |
| N | -3.867712  | -0.085716 | -6.168334 |
| C | -2.717055  | -1.008587 | -6.419479 |
| C | -2.563892  | -2.053058 | -5.295353 |
| C | -2.227270  | -1.417686 | -3.950640 |
| C | -0.839557  | -0.763386 | -3.906924 |
| C | -0.477348  | -0.434426 | -2.456556 |
| N | 0.903659   | 0.084525  | -2.222626 |
| C | -2.861723  | -1.736426 | -7.746532 |
| O | -1.838802  | -2.029364 | -8.418335 |
| H | -10.174007 | -3.804496 | -4.280188 |
| H | -11.496376 | -2.765580 | -3.702011 |
| H | -7.126086  | -1.376002 | -2.528247 |
| H | -5.842297  | -1.522806 | -3.746522 |
| H | -6.119457  | 0.021092  | -2.898463 |
| H | -8.222448  | 0.440200  | -4.027701 |
| H | -8.347158  | -2.134781 | -5.466752 |
| H | -4.404915  | 3.663747  | -7.014374 |
| H | -5.607124  | 3.752409  | -5.715980 |
| H | -1.753708  | 3.315977  | -6.154284 |
| H | -0.845314  | 2.813495  | -3.825411 |
| H | -2.703535  | 2.155144  | -2.156632 |
| H | -6.042863  | 1.955794  | -7.517284 |
| H | -6.361770  | 1.748031  | -4.713489 |

|   |            |           |           |
|---|------------|-----------|-----------|
| H | -3.493047  | -2.652161 | -5.191223 |
| H | -1.764050  | -2.772177 | -5.579591 |
| H | -2.292850  | -2.200050 | -3.164333 |
| H | -3.004516  | -0.665623 | -3.685788 |
| H | -0.084309  | -1.449615 | -4.350857 |
| H | -0.817535  | 0.150603  | -4.535368 |
| H | -0.598999  | -1.363255 | -1.846900 |
| H | -1.213115  | 0.287560  | -2.031160 |
| H | 1.503054   | -0.165250 | -2.999366 |
| H | 1.273428   | -0.371258 | -1.359720 |
| H | 0.968213   | 1.119632  | -2.074816 |
| H | -1.771874  | -0.394643 | -6.463918 |
| H | -4.001922  | 0.077081  | -5.185816 |
| N | -4.196327  | -2.098536 | -8.244447 |
| H | -4.179233  | -2.805318 | -8.943078 |
| H | -4.837035  | -2.299536 | -7.504653 |
| H | -10.949667 | -2.659249 | -5.392857 |
| C | -1.127800  | -2.471518 | 7.614311  |
| C | -1.584292  | -3.897588 | 7.282115  |
| C | -0.468369  | -1.841756 | 6.392044  |
| O | 0.758145   | -1.957710 | 6.234559  |
| N | -1.230696  | -1.161851 | 5.532387  |
| C | -0.654548  | -0.606340 | 4.315756  |
| C | 0.206842   | 0.623396  | 4.530675  |
| O | 0.952943   | 1.017909  | 3.624625  |
| N | 0.077736   | 1.255488  | 5.706348  |
| C | 0.928261   | 2.381965  | 6.041214  |
| C | 0.093193   | 3.499358  | 6.675815  |
| C | -1.085285  | 4.053629  | 5.835593  |
| C | -1.709328  | 5.231544  | 6.598500  |
| C | -0.751940  | 4.425524  | 4.392619  |
| C | 2.102754   | 2.065354  | 6.960817  |
| O | 2.962011   | 2.936148  | 7.208018  |
| N | 2.138951   | 0.826606  | 7.449833  |
| C | 3.046435   | 0.376002  | 8.529235  |
| C | 2.409244   | -0.823449 | 9.259624  |
| C | 3.016491   | -1.094420 | 10.629880 |
| O | 4.142771   | -0.620375 | 10.908264 |
| O | 2.345657   | -1.776835 | 11.467641 |
| C | 4.404126   | 0.012532  | 7.913495  |
| O | 4.748879   | -1.165706 | 7.798646  |
| N | 5.174034   | 1.040767  | 7.564096  |
| C | 6.447536   | 0.879155  | 6.858794  |
| C | 6.163587   | 0.970697  | 5.347603  |
| C | 7.373827   | 0.803909  | 4.468580  |

|   |           |           |           |
|---|-----------|-----------|-----------|
| C | 8.051723  | -0.412867 | 4.414083  |
| C | 9.164884  | -0.569903 | 3.591490  |
| C | 9.584367  | 0.483660  | 2.781428  |
| C | 8.898618  | 1.692355  | 2.806514  |
| C | 7.781227  | 1.840596  | 3.638095  |
| C | 7.366258  | 2.014573  | 7.325315  |
| O | 6.949412  | 3.173221  | 7.360348  |
| H | -2.029892 | -4.374576 | 8.163303  |
| H | -2.337969 | -3.910763 | 6.482035  |
| H | -0.740022 | -4.521617 | 6.958946  |
| H | -0.394596 | -2.493957 | 8.447762  |
| H | -0.042448 | -1.376426 | 3.787273  |
| H | -1.477863 | -0.343355 | 3.610205  |
| H | -2.245696 | -1.077440 | 5.608155  |
| H | -0.310927 | 3.165443  | 7.654345  |
| H | 0.778512  | 4.342759  | 6.906731  |
| H | -1.872975 | 3.245461  | 5.761992  |
| H | -2.610622 | 5.598185  | 6.086909  |
| H | -1.998269 | 4.938806  | 7.615453  |
| H | -1.007908 | 6.072072  | 6.678722  |
| H | -1.618154 | 4.919143  | 3.914692  |
| H | -0.507417 | 3.550417  | 3.759526  |
| H | 0.100741  | 5.116157  | 4.345484  |
| H | 1.382459  | 2.800278  | 5.092226  |
| H | -0.723904 | 1.106075  | 6.282991  |
| H | 2.482280  | -1.732679 | 8.639112  |
| H | 1.320081  | -0.644734 | 9.389488  |
| H | 3.183574  | 1.206129  | 9.271277  |
| H | 1.513673  | 0.122172  | 7.113215  |
| H | 5.429230  | 0.172224  | 5.062282  |
| H | 5.666461  | 1.936474  | 5.108332  |
| H | 7.218051  | 2.786249  | 3.623839  |
| H | 7.690165  | -1.259714 | 5.013239  |
| H | 9.205622  | 2.519705  | 2.159650  |
| H | 9.669733  | -1.540843 | 3.539073  |
| H | 10.440560 | 0.348818  | 2.110101  |
| H | 6.892896  | -0.119454 | 7.102679  |
| H | 4.735295  | 1.951654  | 7.487877  |
| N | 8.748014  | 1.719812  | 7.731358  |
| H | 9.112011  | 0.948702  | 7.216640  |
| H | 9.343727  | 2.515712  | 7.670066  |
| H | -1.983984 | -1.866572 | 7.970449  |
| C | 7.331752  | -4.010984 | -6.096378 |
| C | 8.576567  | -3.109980 | -6.163351 |
| C | 9.230305  | -2.615996 | -4.868272 |

|   |           |           |           |
|---|-----------|-----------|-----------|
| C | 10.661775 | -2.170212 | -5.118413 |
| C | 8.455403  | -1.519974 | -4.137238 |
| C | 6.027491  | -3.195168 | -6.061480 |
| O | 5.545932  | -2.698155 | -7.094373 |
| N | 5.468611  | -3.054578 | -4.862299 |
| C | 4.095583  | -2.554622 | -4.718441 |
| C | 3.911824  | -1.099591 | -4.381543 |
| O | 2.794539  | -0.658349 | -4.139151 |
| N | 4.995567  | -0.332471 | -4.407886 |
| C | 4.896183  | 1.086864  | -4.060862 |
| C | 4.995943  | 1.292456  | -2.527185 |
| O | 4.572091  | 2.640782  | -2.215449 |
| C | 6.428221  | 1.118275  | -2.030538 |
| C | 5.948324  | 1.920390  | -4.808038 |
| O | 6.848540  | 1.349671  | -5.437796 |
| N | 5.827173  | 3.255052  | -4.739299 |
| C | 6.771356  | 4.143552  | -5.426517 |
| C | 6.102954  | 5.480106  | -5.725712 |
| C | 8.056549  | 4.327435  | -4.613065 |
| O | 8.401022  | 5.443773  | -4.202297 |
| N | 8.701928  | 3.216234  | -4.280420 |
| C | 9.900735  | 3.248905  | -3.436626 |
| C | 9.541420  | 3.098927  | -1.952492 |
| C | 10.807585 | 2.144733  | -3.892745 |
| O | 10.523873 | 1.483547  | -4.924891 |
| H | 9.348271  | -3.681349 | -6.721293 |
| H | 8.345725  | -2.232030 | -6.801905 |
| H | 9.275346  | -3.498017 | -4.176614 |
| H | 11.256084 | -2.955046 | -5.605509 |
| H | 11.162938 | -1.921539 | -4.171911 |
| H | 10.702760 | -1.278732 | -5.758475 |
| H | 7.692486  | -1.041916 | -4.775948 |
| H | 7.926372  | -1.928970 | -3.263173 |
| H | 9.111991  | -0.718084 | -3.770143 |
| H | 7.407549  | -4.699204 | -5.226210 |
| H | 3.516443  | -2.729142 | -5.655528 |
| H | 3.607057  | -3.158316 | -3.917452 |
| H | 5.837310  | -3.529647 | -4.013415 |
| H | 4.321358  | 0.569590  | -2.002227 |
| H | 6.908696  | 0.234127  | -2.476726 |
| H | 6.436511  | 0.970120  | -0.937231 |
| H | 7.081010  | 1.985200  | -2.233020 |
| H | 3.623141  | 2.579702  | -1.988782 |
| H | 3.886305  | 1.472642  | -4.399170 |
| H | 5.924155  | -0.705282 | -4.531061 |

|   |           |           |           |
|---|-----------|-----------|-----------|
| H | 5.200382  | 5.350928  | -6.340433 |
| H | 6.787052  | 6.138581  | -6.276340 |
| H | 5.806739  | 6.016026  | -4.811177 |
| H | 7.043558  | 3.668697  | -6.406803 |
| H | 5.283756  | 3.648241  | -3.990005 |
| H | 8.786974  | 2.304372  | -1.795011 |
| H | 10.414631 | 2.865958  | -1.331626 |
| H | 9.097949  | 4.028499  | -1.565139 |
| H | 10.433252 | 4.225547  | -3.583553 |
| H | 8.361180  | 2.318987  | -4.619613 |
| N | 12.028015 | 1.834933  | -3.134027 |
| H | 12.682639 | 1.290204  | -3.648032 |
| H | 12.434931 | 2.651260  | -2.738387 |
| H | 7.309998  | -4.653268 | -6.996984 |
| C | -2.115100 | 8.852236  | 2.478373  |
| C | -2.829161 | 7.702972  | 3.154025  |
| S | -3.192315 | 6.309855  | 2.098584  |
| C | -0.819142 | 8.353152  | 1.832602  |
| O | -0.708944 | 8.212179  | 0.607001  |
| N | 0.192796  | 8.168366  | 2.665821  |
| C | 1.553155  | 7.793296  | 2.242959  |
| C | 2.539492  | 8.993249  | 2.345109  |
| C | 3.910136  | 8.566677  | 1.816146  |
| C | 2.049059  | 10.187149 | 1.548517  |
| C | 2.025497  | 6.590630  | 3.059847  |
| O | 2.391201  | 6.711551  | 4.240582  |
| N | 2.048668  | 5.420351  | 2.415038  |
| C | 2.627851  | 4.187357  | 2.997932  |
| C | 4.032178  | 4.089440  | 2.441479  |
| O | 5.004511  | 4.291440  | 3.128945  |
| N | 4.144586  | 3.774465  | 1.176600  |
| C | 5.423246  | 3.914381  | 0.476832  |
| C | 5.377485  | 5.077690  | -0.516051 |
| O | 6.416693  | 5.576059  | -0.952796 |
| N | 4.175776  | 5.493125  | -0.945800 |
| C | 4.032733  | 6.691594  | -1.800505 |
| C | 3.326938  | 6.519829  | -3.123440 |
| O | 3.230013  | 7.488151  | -3.870100 |
| N | 2.795964  | 5.319891  | -3.445655 |
| C | 2.271150  | 5.171260  | -4.815653 |
| C | 2.169585  | 3.712499  | -5.267372 |
| O | 1.208983  | 3.000320  | -4.532830 |
| C | 0.929782  | 5.879391  | -5.083442 |
| O | 0.770987  | 6.551952  | -6.120197 |
| N | -0.055543 | 5.727206  | -4.202401 |



|   |           |           |           |
|---|-----------|-----------|-----------|
| C | -1.328393 | 6.403450  | -4.485166 |
| C | -2.488904 | 5.918149  | -3.574615 |
| C | -2.591622 | 6.686848  | -2.236799 |
| O | -3.308311 | 7.693347  | -2.164216 |
| N | -1.963825 | 6.176713  | -1.174613 |
| C | -1.145581 | 7.914036  | -4.437678 |
| O | -1.784231 | 8.644519  | -5.210977 |
| N | -0.305771 | 8.375524  | -3.494521 |
| C | -0.056621 | 9.832108  | -3.393890 |
| C | 0.687038  | 10.206047 | -2.124108 |
| C | 0.670737  | 10.373272 | -4.631715 |
| O | 0.251832  | 11.413226 | -5.203006 |
| H | -3.785273 | 8.084466  | 3.571018  |
| H | -2.251149 | 7.370969  | 4.043101  |
| H | -3.055523 | 5.285157  | 2.983751  |
| H | -1.921104 | 9.665494  | 3.205601  |
| H | 2.646279  | 9.282007  | 3.419187  |
| H | 3.858638  | 8.265101  | 0.758440  |
| H | 4.631321  | 9.391072  | 1.887231  |
| H | 4.317713  | 7.721794  | 2.386756  |
| H | 1.850144  | 9.925595  | 0.496481  |
| H | 2.797554  | 10.991166 | 1.547636  |
| H | 1.123407  | 10.610465 | 1.960358  |
| H | 1.504317  | 7.523377  | 1.143179  |
| H | 0.058146  | 8.275287  | 3.648646  |
| H | 1.986655  | 3.319982  | 2.718645  |
| H | 2.631143  | 4.220574  | 4.110845  |
| H | 1.753462  | 5.326443  | 1.427982  |
| H | 5.642254  | 2.969850  | -0.072020 |
| H | 6.268810  | 4.055593  | 1.184231  |
| H | 3.326081  | 3.636487  | 0.598259  |
| H | 5.036990  | 7.134232  | -2.002800 |
| H | 3.474728  | 7.454968  | -1.205104 |
| H | 3.276809  | 5.102668  | -0.597334 |
| H | 1.924296  | 3.687389  | -6.348816 |
| H | 3.144563  | 3.187549  | -5.137796 |
| H | 1.065021  | 2.196290  | -5.046494 |
| H | 3.032690  | 5.643122  | -5.498743 |
| H | 2.537535  | 4.634254  | -2.759745 |
| H | -2.409795 | 4.838712  | -3.360496 |
| H | -3.439330 | 6.058979  | -4.126636 |
| H | -1.284547 | 5.416536  | -1.295608 |
| H | -2.017651 | 6.634374  | -0.290419 |
| H | -1.630149 | 6.127740  | -5.533121 |
| H | 0.001586  | 5.121984  | -3.350922 |

|   |            |           |           |
|---|------------|-----------|-----------|
| H | 0.101276   | 9.953062  | -1.227286 |
| H | 0.885845   | 11.286036 | -2.095590 |
| H | 1.655712   | 9.689618  | -2.030890 |
| H | -1.061988  | 10.335124 | -3.363264 |
| H | 0.096034   | 7.797995  | -2.751861 |
| N | 1.857260   | 9.677071  | -5.149355 |
| H | 1.977530   | 8.747341  | -4.785613 |
| H | 1.916150   | 9.711692  | -6.141405 |
| H | -2.766096  | 9.294055  | 1.693190  |
| C | -7.243322  | 4.717191  | -2.335720 |
| C | -5.835339  | 4.805646  | -1.725226 |
| O | -5.898979  | 4.555263  | -0.328362 |
| C | -7.781088  | 3.294717  | -2.357242 |
| O | -7.416476  | 2.517607  | -3.252398 |
| N | -8.620706  | 2.918788  | -1.379102 |
| C | -9.196929  | 1.568820  | -1.360229 |
| C | -10.458688 | 1.460857  | -0.546455 |
| O | -10.821444 | 2.405872  | 0.152465  |
| N | -11.143252 | 0.325309  | -0.689218 |
| C | -12.316756 | 0.052475  | 0.097331  |
| C | -13.388119 | -0.707029 | -0.687408 |
| C | -12.976311 | -2.019021 | -1.311102 |
| C | -11.912102 | -0.685890 | 1.356345  |
| O | -10.780807 | -1.232716 | 1.428502  |
| H | -5.127762  | 4.121165  | -2.230401 |
| H | -5.444834  | 5.837813  | -1.806388 |
| H | -7.193930  | 5.093815  | -3.376578 |
| H | -9.373847  | 1.250037  | -2.415000 |
| H | -8.443430  | 0.849497  | -0.950465 |
| H | -8.674610  | 3.457359  | -0.528318 |
| H | -14.254487 | -0.880708 | -0.014824 |
| H | -13.773763 | -0.039841 | -1.486070 |
| H | -12.466878 | -2.672171 | -0.589081 |
| H | -12.292081 | -1.907783 | -2.174286 |
| H | -12.770087 | 1.033359  | 0.411752  |
| H | -10.693724 | -0.462422 | -1.131744 |
| N | -12.840276 | -0.764196 | 2.493279  |
| H | -13.786138 | -0.814753 | 2.187727  |
| H | -12.612294 | -1.494278 | 3.130347  |
| H | -13.856414 | -2.562784 | -1.680106 |
| H | -7.931170  | 5.402488  | -1.798421 |
| H | -5.649748  | 3.630161  | -0.192020 |
| C | -10.382948 | -5.972287 | 4.469457  |
| C | -9.067743  | -5.677313 | 3.717861  |
| C | -8.599757  | -4.236976 | 3.857549  |

|   |            |           |          |
|---|------------|-----------|----------|
| C | -7.548797  | -3.841781 | 2.821505 |
| C | -7.161050  | -2.373805 | 2.984280 |
| N | -6.818613  | -2.025240 | 4.396428 |
| C | -10.224856 | -5.613574 | 5.952550 |
| O | -9.568794  | -6.369182 | 6.716133 |
| H | -9.217822  | -5.918367 | 2.645800 |
| H | -8.271484  | -6.364606 | 4.068235 |
| H | -9.470740  | -3.553575 | 3.763630 |
| H | -8.218840  | -4.105512 | 4.891874 |
| H | -7.936897  | -3.995921 | 1.791608 |
| H | -6.655055  | -4.501044 | 2.899008 |
| H | -7.975655  | -1.701423 | 2.619148 |
| H | -6.285901  | -2.146653 | 2.324397 |
| H | -7.641810  | -2.028649 | 4.964614 |
| H | -6.362531  | -1.062139 | 4.417250 |
| H | -10.631129 | -7.045599 | 4.376422 |
| N | -10.839435 | -4.388211 | 6.481470 |
| H | -10.451670 | -4.105513 | 7.353927 |
| H | -10.812333 | -3.657265 | 5.805154 |
| H | -6.165786  | -2.696536 | 4.757991 |
| H | -11.222448 | -5.412884 | 4.014578 |
| C | -5.121477  | 3.652631  | 4.905185 |
| C | -4.462300  | 2.944144  | 3.703070 |
| C | -3.631825  | 1.688721  | 4.042252 |
| C | -4.461051  | 0.457952  | 4.446731 |
| O | -5.660798  | 0.398362  | 4.080232 |
| O | -3.932877  | -0.458395 | 5.130393 |
| C | -5.726454  | 4.985397  | 4.414918 |
| O | -5.322068  | 6.072230  | 4.862403 |
| N | -6.739379  | 4.886997  | 3.544446 |
| C | -7.415200  | 6.023070  | 2.908449 |
| C | -8.520293  | 5.517399  | 1.977018 |
| O | -8.062299  | 4.402065  | 1.197191 |
| C | -8.063950  | 6.898407  | 3.981419 |
| O | -8.161953  | 8.140447  | 3.805713 |
| H | -5.234508  | 2.669865  | 2.954945 |
| H | -3.782908  | 3.678003  | 3.201744 |
| H | -3.031392  | 1.411737  | 3.147744 |
| H | -2.898721  | 1.950431  | 4.842090 |
| H | -4.366150  | 3.847043  | 5.693141 |
| H | -9.386027  | 5.098971  | 2.520905 |
| H | -8.877074  | 6.334562  | 1.322868 |
| H | -6.661547  | 6.632486  | 2.336665 |
| H | -6.879915  | 3.991523  | 3.111859 |
| N | -8.573495  | 6.289215  | 5.218263 |

|   |            |           |           |
|---|------------|-----------|-----------|
| H | -8.100999  | 5.455365  | 5.483459  |
| H | -8.623047  | 6.943445  | 5.966975  |
| H | -5.898810  | 3.014395  | 5.366387  |
| H | -7.351572  | 4.729124  | 0.635957  |
| C | -9.737544  | 1.349111  | 3.673706  |
| C | -8.635840  | 1.187936  | 2.633352  |
| C | -9.239315  | 2.244562  | 4.830910  |
| O | -9.370393  | 3.494262  | 4.761079  |
| H | -8.326098  | 2.158574  | 2.218825  |
| H | -8.976002  | 0.569493  | 1.789942  |
| H | -7.739176  | 0.709784  | 3.049644  |
| H | -10.058046 | 0.363965  | 4.061682  |
| N | -8.612022  | 1.636137  | 6.012992  |
| H | -8.054482  | 0.856957  | 5.734809  |
| H | -8.073492  | 2.295095  | 6.533330  |
| H | -10.630171 | 1.814488  | 3.213927  |
| C | 7.191432   | 11.534671 | -0.870592 |
| C | 5.992166   | 11.043510 | -1.634523 |
| N | 4.958983   | 11.842850 | -1.949284 |
| C | 4.066660   | 11.143796 | -2.676040 |
| N | 4.525443   | 9.888816  | -2.798075 |
| C | 5.717592   | 9.796270  | -2.174327 |
| H | 7.873582   | 10.703706 | -0.654594 |
| H | 6.894932   | 11.989831 | 0.082289  |
| H | 6.307469   | 8.876026  | -2.112580 |
| H | 4.046662   | 9.110192  | -3.240729 |
| H | 3.124582   | 11.544263 | -3.066242 |
| H | 7.742276   | 12.287080 | -1.448680 |
| C | 5.517300   | -4.877852 | 5.682854  |
| C | 4.893544   | -3.553376 | 5.277123  |
| C | 4.851947   | -3.066135 | 3.866678  |
| C | 4.504093   | -4.197039 | 2.925507  |
| C | 3.768292   | -1.998390 | 3.927942  |
| C | 7.051823   | -4.878054 | 5.480957  |
| O | 7.558893   | -5.500146 | 4.511692  |
| H | 3.836614   | -3.616439 | 5.648096  |
| H | 5.358976   | -2.757612 | 5.903355  |
| H | 5.822903   | -2.612781 | 3.549777  |
| H | 3.487194   | -1.642773 | 2.923872  |
| H | 2.851811   | -2.363838 | 4.418297  |
| H | 4.129246   | -1.115477 | 4.489147  |
| H | 5.345029   | -4.896247 | 2.807613  |
| H | 3.640741   | -4.774480 | 3.286085  |
| H | 4.255075   | -3.817339 | 1.921718  |
| H | 5.078925   | -5.712748 | 5.099077  |

|   |           |           |           |
|---|-----------|-----------|-----------|
| N | 7.916594  | -4.151558 | 6.421457  |
| H | 7.473177  | -3.997161 | 7.297818  |
| H | 8.827985  | -4.538573 | 6.507078  |
| H | 5.283259  | -5.082931 | 6.746228  |
| C | 9.866521  | -6.454318 | 1.750401  |
| C | 10.063276 | -4.965643 | 2.021599  |
| S | 8.649895  | -3.908941 | 1.653326  |
| C | 11.237817 | -7.137602 | 1.737893  |
| O | 11.751595 | -7.497717 | 0.646710  |
| H | 10.888594 | -4.562683 | 1.394462  |
| H | 10.367512 | -4.812228 | 3.074308  |
| H | 7.615326  | -4.749170 | 1.794675  |
| H | 9.358076  | -6.612559 | 0.774485  |
| N | 11.953881 | -7.372917 | 3.000203  |
| H | 12.939097 | -7.444651 | 2.880148  |
| H | 11.706124 | -6.697380 | 3.688030  |
| H | 9.209458  | -6.911719 | 2.517388  |
| C | 13.937772 | -0.835126 | 1.097273  |
| C | 12.858132 | -1.492812 | 0.242703  |
| C | 12.841490 | -2.886158 | 0.039202  |
| C | 11.831666 | -3.480972 | -0.744115 |
| C | 10.825066 | -2.699244 | -1.295061 |
| C | 10.823308 | -1.317360 | -1.082953 |
| C | 11.829186 | -0.724091 | -0.310126 |
| H | 13.481862 | -0.310088 | 1.945431  |
| H | 14.500911 | -0.102970 | 0.506737  |
| H | 13.622113 | -3.511385 | 0.482423  |
| H | 11.804373 | 0.356854  | -0.130332 |
| H | 11.836943 | -4.564926 | -0.902806 |
| H | 10.024518 | -0.701723 | -1.515142 |
| H | 10.025584 | -3.157499 | -1.894669 |
| H | 14.645776 | -1.573433 | 1.490947  |
| O | 0.793764  | 1.020029  | -6.555997 |
| O | -4.924658 | 8.233201  | -0.046523 |
| O | -5.889293 | -3.846794 | -5.302822 |
| O | 1.027638  | 7.168362  | -1.274310 |
| O | 0.499535  | -1.871117 | -6.773227 |
| O | 3.326916  | -7.521259 | 5.452881  |
| O | -8.578697 | -1.649457 | -0.161203 |
| O | 2.419737  | -3.784283 | 7.684342  |
| H | 0.678025  | 0.064570  | -6.445985 |
| H | 1.481724  | 1.145808  | -7.200634 |
| H | -4.683901 | 7.485696  | 0.498110  |
| H | -4.379870 | 8.199208  | -0.840218 |
| H | -5.177444 | -4.430618 | -5.026460 |

|    |           |           |           |
|----|-----------|-----------|-----------|
| H  | -5.531282 | -3.195880 | -5.902749 |
| H  | 1.152651  | 6.232153  | -1.022345 |
| H  | 0.595667  | 7.608772  | -0.531087 |
| H  | 0.723851  | -2.692306 | -6.310405 |
| H  | -0.220446 | -2.040728 | -7.388698 |
| H  | 4.113362  | -7.852980 | 5.032754  |
| H  | 2.706216  | -7.297443 | 4.744142  |
| H  | -7.640516 | -1.455552 | -0.240434 |
| H  | -8.839486 | -2.188618 | -0.900351 |
| H  | 2.795300  | -3.368416 | 8.456871  |
| H  | 2.678051  | -3.275254 | 6.917290  |
| Na | 5.191120  | 5.146657  | 5.916166  |

### 3 F9 system

#### 3.1 F9 substrate

31

F9 substrate only

|   |             |             |             |
|---|-------------|-------------|-------------|
| O | -0.25077700 | 2.15224400  | 3.11045800  |
| S | 0.02447700  | 2.56371400  | 1.71918700  |
| O | 0.33917400  | 3.96610200  | 1.43693900  |
| N | -1.40422800 | 2.26346600  | 0.90668000  |
| C | -1.95349900 | 0.90274300  | 0.95050500  |
| C | -3.39717800 | 0.84044900  | 1.40814200  |
| O | -3.80030400 | -0.52586500 | 1.23543300  |
| P | -5.23491300 | -0.76369800 | 0.47055200  |
| O | -5.26106700 | 0.13365800  | -0.76513100 |
| O | -6.30300500 | -0.29072100 | 1.49266300  |
| O | -5.29504800 | -2.26446400 | 0.15999200  |
| C | 1.24009300  | 1.42272500  | 1.09589000  |
| C | 1.38591400  | 1.18098600  | -0.29858000 |
| C | 2.33675700  | 0.27334000  | -0.74272300 |
| C | 2.13623300  | 0.79819800  | 1.99034700  |
| C | 3.10836200  | -0.09303400 | 1.54738300  |
| C | 3.18476900  | -0.37120900 | 0.16650500  |
| O | 4.05684400  | -1.31762200 | -0.43280700 |
| C | 4.95987300  | -2.01467900 | 0.26446000  |
| F | 5.63223900  | -2.81111700 | -0.59295100 |
| F | 5.85818200  | -1.23117800 | 0.90294800  |
| F | 4.41181100  | -2.81858400 | 1.20829600  |
| H | -1.34026000 | 0.26957600  | 1.60126500  |
| H | -1.91807100 | 0.45151900  | -0.05087500 |
| H | -3.49483800 | 1.12677900  | 2.46684600  |

|   |             |             |             |
|---|-------------|-------------|-------------|
| H | -4.02553800 | 1.51783000  | 0.80708800  |
| H | 0.74657600  | 1.67826000  | -1.03106600 |
| H | 2.43645500  | 0.04848500  | -1.80463000 |
| H | 2.05153200  | 1.01098000  | 3.05569900  |
| H | 3.80194700  | -0.53593700 | 2.26824900  |
| H | -1.41832700 | 2.71444600  | -0.02736200 |

### 3.2 F9 substrate in a 5 Å protein cluster

422

F9 substrate in an 5 Angstrom protein complex

|   |             |             |             |
|---|-------------|-------------|-------------|
| O | -0.25077700 | 2.15224400  | 3.11045800  |
| S | 0.02447700  | 2.56371400  | 1.71918700  |
| O | 0.33917400  | 3.96610200  | 1.43693900  |
| N | -1.40422800 | 2.26346600  | 0.90668000  |
| C | -1.95349900 | 0.90274300  | 0.95050500  |
| C | -3.39717800 | 0.84044900  | 1.40814200  |
| O | -3.80030400 | -0.52586500 | 1.23543300  |
| P | -5.23491300 | -0.76369800 | 0.47055200  |
| O | -5.26106700 | 0.13365800  | -0.76513100 |
| O | -6.30300500 | -0.29072100 | 1.49266300  |
| O | -5.29504800 | -2.26446400 | 0.15999200  |
| C | 1.24009300  | 1.42272500  | 1.09589000  |
| C | 1.38591400  | 1.18098600  | -0.29858000 |
| C | 2.33675700  | 0.27334000  | -0.74272300 |
| C | 2.13623300  | 0.79819800  | 1.99034700  |
| C | 3.10836200  | -0.09303400 | 1.54738300  |
| C | 3.18476900  | -0.37120900 | 0.16650500  |
| O | 4.05684400  | -1.31762200 | -0.43280700 |
| C | 4.95987300  | -2.01467900 | 0.26446000  |
| F | 5.63223900  | -2.81111700 | -0.59295100 |
| F | 5.85818200  | -1.23117800 | 0.90294800  |
| F | 4.41181100  | -2.81858400 | 1.20829600  |
| H | -1.34026000 | 0.26957600  | 1.60126500  |
| H | -1.91807100 | 0.45151900  | -0.05087500 |
| H | -3.49483800 | 1.12677900  | 2.46684600  |
| H | -4.02553800 | 1.51783000  | 0.80708800  |
| H | 0.74657600  | 1.67826000  | -1.03106600 |
| H | 2.43645500  | 0.04848500  | -1.80463000 |
| H | 2.05153200  | 1.01098000  | 3.05569900  |
| H | 3.80194700  | -0.53593700 | 2.26824900  |
| H | -1.41832700 | 2.71444600  | -0.02736200 |
| C | -4.56527900 | 6.87148700  | 2.35399200  |
| C | -3.78599200 | 5.63698800  | 1.83480900  |
| C | -3.09698600 | 5.89439300  | 0.51694000  |

C -3.80629000 5.80577500 -0.68214500  
C -3.20584400 6.12062100 -1.90155100  
C -1.84925100 6.47976200 -1.93583200  
C -1.13145900 6.56530400 -0.73832700  
C -1.76160300 6.28640300 0.47308800  
C -5.33267400 7.50456800 1.21136400  
D -6.40769600 7.00553800 0.81817900  
N -4.76740900 8.58346800 0.65829400  
C -0.86556600 8.42968400 4.49289100  
C -0.93643800 6.90776900 4.44560500  
C 0.32022400 6.21226900 4.03525900  
C 1.50816100 6.47225100 4.95323200  
D 1.42141700 6.56600900 6.21902900  
D 2.58871600 6.51866800 4.35903700  
C -1.16858100 9.06217200 3.13226600  
D -2.28207800 8.96103100 2.62378400  
N -0.17434900 9.71661300 2.54783200  
C 3.12759100 -1.99977500 -5.13404900  
C 3.83413900 -1.63978700 -3.82618100  
C 1.62715100 -1.74089600 -5.03757800  
D 0.97250200 -2.13497600 -4.06634200  
N 1.09480700 -1.07668100 -6.05542200  
C -0.30945300 -0.66454100 -6.07851100  
C -0.42288100 0.84678300 -6.28785600  
C -0.06631500 1.61746400 -5.04677200  
D -0.80528900 1.49102000 -4.03059200  
D 0.96423700 2.35594900 -5.07986300  
C -1.16619600 -1.38713200 -7.08631800  
D -0.77938200 -1.56405800 -8.25055000  
N -2.34266300 -1.82247000 -6.62116800  
C -4.46394900 3.35651900 -6.72945500  
C -3.66839000 3.07535200 -5.42957900  
C -4.65057600 3.19716200 -4.24375500  
C -4.13614700 2.66159600 -2.92342300  
C -2.47619800 4.03054000 -5.30866800  
C -3.64509300 3.66556800 -7.98835400  
D -3.23924600 4.83744100 -8.20309300  
C 4.00261400 6.86401600 0.50753900  
C 2.67987800 6.10956500 0.19217100  
C 2.85002600 4.69933800 -0.42929800  
C 3.24239700 4.77780500 -1.91123400  
C 3.75362500 3.74544500 0.33682000  
C 4.77197000 7.22472700 -0.75703100  
D 4.21994400 7.86059800 -1.68370500  
N 6.04361600 6.82290600 -0.79043900



C 7.46182700 4.79938400 3.61733400  
C 6.06076400 4.19947400 3.84961600  
C 5.96368000 2.66682900 3.84445400  
C 4.54418900 2.28679900 4.27364800  
C 6.24198500 2.08228900 2.47818400  
C 7.86566700 4.72363500 2.15416900  
D 7.16421100 5.22974200 1.28363600  
N 9.03811100 4.15633000 1.88987300  
C 7.56806700 1.12338500 -1.00140700  
C 6.27924300 1.27552200 -1.82051900  
C 8.48333600 0.06240100 -1.61004300  
D 8.34778900 -1.13670200 -1.31946600  
N 9.43446200 0.49437200 -2.43337300  
C 7.15370700 -3.24745800 6.36334200  
C 7.04051400 -3.49867000 4.84404300  
C 6.70351200 -2.19802800 4.08075700  
C 5.28802700 -1.68780000 4.21146800  
C 6.09944300 -4.66097900 4.56650000  
C 7.48193500 -4.56718400 7.03177900  
D 8.60728900 -5.10145200 6.85143900  
C 3.58906400 -1.27243700 8.84907400  
C 3.95302200 -0.81384900 7.43274800  
C 2.76381000 -0.70333500 6.54373600  
C 2.11565700 -1.84661000 6.04464200  
C 0.96912000 -1.72050300 5.24938000  
C 0.50392300 -0.46908100 4.91838900  
D -0.62037400 -0.30405800 4.11754600  
C 1.14004200 0.66798800 5.39911500  
C 2.26229400 0.53232800 6.20779200  
C 3.42801100 -2.78975700 8.87544600  
D 4.36812300 -3.52905300 8.48271700  
C 1.10215900 -6.07525500 5.94806700  
C 2.09181400 -6.63897300 4.91180600  
C 2.78449900 -5.77654800 3.89403200  
C 3.68065000 -6.66101300 3.03414900  
C 1.77294400 -4.99502400 3.04812000  
C 0.11646000 -7.19110900 6.23241100  
D 0.48912900 -8.20180900 6.85580600  
N -1.10334500 -7.04762000 5.72854600  
C -2.87589400 -2.66154300 -2.58158800  
C -2.72502100 -1.13566700 -2.55778700  
D -2.64912300 -0.60125700 -3.89201600  
C -1.47143300 -0.75492800 -1.77409600  
C -4.16549500 -3.00852000 -3.30302400  
D -4.14698800 -3.27544600 -4.50978000

N -5.26239300 -3.09495100 -2.55179500  
C -6.58306900 -3.24540600 -3.17339700  
C -7.63827000 -3.72809700 -2.19914900  
D -7.38343700 -4.63529800 -1.41920200  
N -8.82589000 -3.12336200 -2.27005700  
C -2.75342600 -2.29046800 6.07484900  
C -2.67571000 -3.32284400 4.96986500  
D -1.92825700 -4.32212800 5.09343000  
N -3.40504400 -3.01865400 3.89966800  
C -3.69746500 -3.82136900 2.70339600  
C -2.60362000 -4.82053100 2.28175000  
C -1.46265900 -4.23187600 1.46816100  
C -0.95315100 -3.00380100 1.76891700  
C 0.11075100 -2.48251700 1.07369700  
C 0.65518800 -3.18392300 0.03909800  
C 0.15834800 -4.41405300 -0.28705900  
C -0.87490600 -4.95124600 0.42905800  
C -4.99934300 -4.62863800 2.77618200  
D -5.08832600 -5.57415500 3.46482400  
N -5.99097600 -4.16163000 2.06836300  
C -7.27651000 -4.85751700 1.99690800  
C -8.25651800 -4.46658100 3.09212700  
D -9.30589500 -5.09585300 3.18358500  
N -7.93497700 -3.46407300 3.91190100  
N -4.80396300 1.01426000 8.46676500  
C -4.74361000 1.91075100 7.29728900  
C -3.29401400 1.98318900 6.73623400  
C -2.37949200 2.68524500 7.74503000  
C -0.89564200 2.38810600 7.51883100  
C -3.24943700 2.68791200 5.37822000  
C -5.68131000 1.41483200 6.20454200  
D -5.73789300 0.21281500 5.94183200  
N -6.41991400 2.32602200 5.57489900  
C -7.29876600 1.97214700 4.44837800  
C -8.78761300 2.09189400 4.85875700  
D -9.67911500 1.77831200 3.78077600  
C -7.04046700 2.92544900 3.30131000  
D -7.16122900 4.15005300 3.46867200  
N -6.71691900 2.37212200 2.13112100  
C -6.40975000 3.23293400 0.97476300  
C -7.40025900 3.05722100 -0.14271500  
D -8.19943100 3.95706000 -0.42900200  
N -7.38112200 1.88336600 -0.76078900  
C -8.26006300 1.63966900 -1.90480400  
C -8.08269300 0.22029900 -2.43304300

O -6.77811500 0.05499200 -2.96725700  
C -9.73442900 1.90343200 -1.62346500  
O -10.42447200 2.42131600 -2.49358600  
N -10.22257000 1.54802100 -0.42818200  
C 11.72784300 -4.40633200 -4.48008200  
C 11.00151900 -4.26044100 -3.15785400  
O 11.63056500 -4.19368800 -2.11433900  
N 9.66129900 -4.28200400 -3.18762900  
C 8.95563700 -4.31850400 -1.91713500  
C 7.49664700 -4.50793200 -2.34392200  
C 7.42028100 -3.87326400 -3.72159400  
C 8.74800400 -4.20999500 -4.34336600  
C 9.39388000 -5.49485500 -1.03649300  
O 9.77701900 -6.56443600 -1.54954300  
N 9.35419200 -5.28206700 0.26606500  
O -5.16834800 -0.17252500 -5.27647600  
O 4.61777700 6.98493200 5.79610800  
O 6.30108500 -5.25097900 0.92069800  
O -8.92159900 -0.46128500 1.14561400  
O 8.20881500 -2.78590400 0.96305400  
O 3.86724300 -5.27627200 -0.25672700  
O -5.79243400 -1.49414500 3.80322900  
O 2.21155700 -7.48074300 -0.01451900  
O -6.85120800 -2.03464200 -6.47503700  
O 4.74500700 -5.23327500 -5.62294000  
O 3.37166200 -5.03611900 -2.97840900  
O 10.60230000 -3.01180900 5.06538300  
O -7.20424800 -7.00180300 4.84833000  
O -9.59026700 -1.82334600 -4.86835000  
O 9.75596700 -1.26860200 2.56034900  
O -5.26999700 -5.10256200 -6.12917000  
O 9.03689100 0.85955900 3.44289500  
O -1.01117100 3.17409600 -1.72949200  
H -3.04051600 5.32595700 2.59568000  
H -4.48821800 4.78032700 1.70129700  
H -1.17951400 6.34304700 1.40577900  
H -4.85522800 5.47267500 -0.67234100  
H -0.05814100 6.80373300 -0.75093200  
H -3.77719500 6.02150600 -2.83292300  
H -1.35403400 6.67082800 -2.89310600  
H -3.82018400 7.59639500 2.80634600  
H -3.92320700 8.95072000 1.05732600  
H -1.20632700 6.51764100 5.45342100  
H -1.77109400 6.58735400 3.77721200  
H 0.58103800 6.47189600 2.98522700

H 0.14224900 5.11689100 4.01927500  
H 0.13691800 8.73831200 4.89306500  
H 0.73004700 9.76504000 2.97155000  
H 4.89045300 -1.94755600 -3.84647600  
H 3.80779700 -0.55932400 -3.61675300  
H 3.35754400 -2.15298500 -2.97763300  
H 3.24576200 -3.11412100 -5.27288300  
H 0.19026700 1.17092800 -7.15595200  
H -1.46963300 1.09850800 -6.56905000  
H -0.71042100 -0.86324900 -5.03651800  
H 1.63883700 -0.74341600 -6.82321900  
H -2.68883700 -1.44685500 -5.74412300  
H -3.26321400 2.02837100 -5.44347600  
H -2.78924600 5.08164200 -5.36132000  
H -1.96070400 3.88418000 -4.34667900  
H -1.74096500 3.85144700 -6.10367900  
H -4.92745300 4.26831800 -4.12529300  
H -5.60271400 2.67724300 -4.47832600  
H -3.09062000 2.31593200 -2.99255200  
H -4.17799500 3.42620200 -2.13269500  
H -4.72197100 1.79727600 -2.57624800  
H -5.02368800 4.31748200 -6.52052300  
H 2.03574300 6.71445800 -0.48298100  
H 2.11130900 5.99755300 1.14180800  
H 1.81894300 4.26052500 -0.42311200  
H 4.55313300 4.30813600 0.85563900  
H 4.24422200 3.01000800 -0.32673300  
H 3.20415100 3.18740400 1.10809800  
H 2.64713000 5.53116300 -2.44352600  
H 4.30144600 5.03153500 -2.04728500  
H 3.07662100 3.81456800 -2.41406200  
H 4.59235200 6.15423100 1.16857500  
H 6.42165600 6.22130000 -0.06434300  
H 5.67399400 4.56180100 4.82966900  
H 5.34922900 4.60886600 3.09489300  
H 6.69673100 2.24893800 4.57619300  
H 3.79862900 2.65434000 3.55260600  
H 4.28808900 2.71228200 5.25444200  
H 4.42176700 1.19517800 4.34723600  
H 5.67407700 2.60146600 1.68903700  
H 7.30665000 2.13471500 2.20662600  
H 5.95216000 1.01910300 2.43013600  
H 8.20307700 4.31319700 4.29953600  
H 9.47550600 3.55507700 2.55898900  
H 5.55275400 1.93696500 -1.30846300

H 6.46051900 1.69652200 -2.82097000  
H 5.79114100 0.30055300 -1.95883500  
H 7.28065000 0.74745800 0.02149500  
H 9.53259100 1.44430400 -2.82417900  
H 8.05431000 -3.81389700 4.46720000  
H 5.99320100 -4.82190000 3.48125900  
H 5.07539000 -4.50386100 4.95474700  
H 6.47389300 -5.60317800 4.98989800  
H 7.42483200 -1.39511300 4.35728100  
H 6.89391300 -2.39778200 3.00417300  
H 5.07603300 -0.87981300 3.48625800  
H 5.07627400 -1.29548400 5.22144200  
H 4.54966600 -2.48114000 4.01484300  
H 6.15211300 -2.85574200 6.72419000  
H 4.45418000 0.17924300 7.47061700  
H 4.70457400 -1.49607900 6.95296300  
H 2.51137200 -2.84483600 6.26539500  
H 2.73030600 1.44617900 6.61533800  
H 0.46251100 -2.62421700 4.87934900  
H 0.76333900 1.68256400 5.17945700  
H -0.67542900 0.62785600 3.87856000  
H 2.63861800 -0.77192700 9.17006100  
H 2.87168600 -7.22478100 5.45170700  
H 1.54479600 -7.40916100 4.31719200  
H 3.44781300 -5.02993900 4.42154800  
H 2.27219600 -4.23725000 2.42912400  
H 1.04387900 -4.48319000 3.69825000  
H 1.21260400 -5.65547800 2.37093300  
H 4.16571900 -6.07026000 2.24282100  
H 4.47833500 -7.12577900 3.63011200  
H 3.11797300 -7.46781900 2.54069600  
H 0.61582000 -5.15017800 5.52106300  
H -1.41687800 -6.12844100 5.41520900  
H -3.64024300 -0.67639600 -2.09004200  
H -1.37966000 0.34553900 -1.70260500  
H -0.54039000 -1.10924800 -2.24223800  
H -1.50016600 -1.14631100 -0.74366000  
H -2.07146800 0.18508000 -3.88316600  
H -2.90610000 -3.01713200 -1.51387200  
H -6.86301400 -2.28137800 -3.66848700  
H -6.52792800 -3.98662800 -4.00771200  
H -5.26093300 -2.73539500 -1.56769500  
H -9.02001900 -2.48546500 -3.04218300  
H -2.20740600 -1.36587700 5.78399800  
H -3.80246900 -1.97924900 6.28410800

H -2.15397800 -5.33123500 3.16150200  
H -3.06551500 -5.62912400 1.67683400  
H -1.37814000 -2.39479200 2.58066800  
H -1.23119000 -5.96208100 0.20022800  
H 0.50800100 -1.49425500 1.34774300  
H 0.62411600 -4.99023000 -1.09943300  
H 1.49283000 -2.76265600 -0.53374500  
H -3.76371900 -3.04126700 1.88510400  
H -4.10035100 -2.26609700 3.97932900  
H -7.73991600 -4.63779200 1.00957600  
H -7.13731600 -5.96324400 2.03472800  
H -5.82335700 -3.37911100 1.38144400  
H -7.14492500 -2.82599300 3.74692100  
H -2.92089200 0.93644100 6.58154900  
H -2.20694300 2.83185900 5.05255300  
H -3.71994300 3.68026400 5.41335100  
H -3.74675300 2.09970100 4.59428400  
H -2.54936400 3.77912700 7.70411200  
H -2.65058100 2.37439800 8.77838700  
H -0.27071100 2.91859200 8.24856800  
H -0.56654100 2.70105300 6.51520700  
H -0.67894600 1.31521500 7.60961900  
H -5.04487500 2.92317700 7.67015800  
H -4.72047900 0.05736000 8.18656700  
H -4.03455900 1.24452900 9.07060300  
H -9.06526800 3.12951600 5.11393600  
H -9.00231700 1.44330400 5.73098100  
H -9.59428500 0.83469900 3.62112300  
H -7.11253000 0.90044000 4.14542300  
H -6.26257100 3.29974500 5.73322300  
H -6.31525800 4.31133400 1.25894900  
H -5.38374700 2.93665100 0.62554100  
H -6.59889500 1.34971800 1.98861500  
H -8.30090300 -0.53845800 -1.65245500  
H -8.74585400 0.03351600 -3.29921800  
H -6.14628400 0.05024300 -2.22998100  
H -7.95211900 2.35338800 -2.72478800  
H -6.57630700 1.22863200 -0.64917400  
H -9.71042000 0.90196000 0.17965000  
H 11.23152900 -3.81219800 -5.29130200  
H 6.79758500 -4.00217000 -1.62721600  
H 7.18718100 -5.57851600 -2.35003300  
H 7.26116700 -2.77682500 -3.64953300  
H 6.56494100 -4.25620400 -4.30897600  
H 9.09080600 -3.44512900 -5.07396600

H 8.73455300 -5.18012200 -4.88388000  
H 9.10800200 -3.33426100 -1.39505700  
H 8.99892800 -4.38832000 0.62111900  
H -5.80267800 -0.88030600 -5.43350900  
H -4.94949700 -0.13531100 -4.35163900  
H 3.72489000 6.63988800 5.68639200  
H 4.91063300 7.26603300 4.93037500  
H 5.42612600 -5.09989700 0.55080900  
H 6.65959300 -4.41631300 1.21337700  
H -8.88202600 -1.29036700 0.67813600  
H -8.01989600 -0.25930600 1.45060800  
H 8.16825500 -2.22382700 0.17511900  
H 8.62507800 -2.27913200 1.66679300  
H 3.67290700 -4.93046700 -1.13917900  
H 4.22893700 -6.15671300 -0.37513900  
H -5.93051800 -1.03650200 2.95300600  
H -5.91049500 -0.86475000 4.51961600  
H 1.87116500 -7.30660600 -0.89706800  
H 2.61680200 -6.66380300 0.29662800  
H -7.57654400 -1.77578300 -7.03808900  
H -6.90771500 -2.97804400 -6.32905400  
H 4.33769600 -4.56915500 -6.19433200  
H 5.67149600 -5.02168600 -5.54534000  
H 2.43875400 -4.96923700 -3.17716800  
H 3.85414800 -5.13237700 -3.80505700  
H 10.03539700 -3.30881000 5.77262000  
H 11.04754400 -3.77796100 4.68905400  
H -7.33327100 -6.64321800 3.97323300  
H -6.26611300 -7.01702500 5.01662200  
H -10.48111400 -2.12694000 -5.01452700  
H -8.98814300 -2.44641000 -5.29877800  
H 10.62766400 -1.08030100 2.18880500  
H 9.87569800 -1.68706200 3.41381800  
H -6.17379300 -4.97110900 -6.42934500  
H -4.92517100 -4.27405500 -5.78485300  
H 8.23612500 0.80978300 2.92658400  
H 9.74724800 0.48052700 2.92041100  
H -1.73975700 3.18572000 -2.35368700  
H -0.28852400 2.69887000 -2.14606300  
N -3.33409500 2.59354500 -8.94421900  
H -2.49613700 2.76479200 -9.45178900  
H -3.36512300 1.67365900 -8.54056900  
N 6.48610400 -5.22336600 7.89194000  
H 5.57346600 -4.80890300 7.84247600  
H 6.49027500 -6.21368700 7.82341200

N 2.17520700 -3.38765700 9.35958200  
H 1.38425300 -2.83932400 9.10723000  
H 2.07153800 -4.35051400 9.13112200  
H -2.03722209 -3.14133633 -3.04129203  
H 11.73404212 -5.43798776 -4.76389172  
H 12.71529276 -4.00823633 -4.37348551  
H 9.65240928 -5.96325768 0.93467977  
H 3.55689102 -1.49263687 -5.97274585  
H -3.03047372 -2.22192556 -7.22726343  
H -9.59152096 -3.36433385 -1.67361606  
H -8.54213842 -3.17289643 4.65120555  
H -2.34374013 -2.64660955 6.99692312  
H 7.41636656 5.84578085 3.83616494  
H 9.34994198 4.07662036 0.94308484  
H 8.02226509 2.07864865 -0.83992802  
H 10.04583768 -0.12822235 -2.92183595  
H 6.65182137 7.07411101 -1.54342125  
H 3.81228486 7.78751799 1.01332442  
H -0.32045679 10.27050084 1.72816086  
H -1.61606275 8.78715905 5.16658694  
H -5.03413591 8.94683978 -0.23435246  
H -5.26858062 6.60736327 3.11590111  
H 7.94548927 -2.55168397 6.54740539  
H 4.34775571 -0.96679713 9.53890815  
H -11.19159426 1.69295205 -0.22821455  
H -1.80146762 -7.74085491 5.90757160  
H 1.61235283 -5.77024760 6.83777074  
H -5.18142218 2.58795556 -6.92805629

### 3.3 F9 substrate in an 8 Å protein cluster

857

F9 substrate in an 8 Angstrom protein complex

O -0.25077700 2.15224400 3.11045800  
S 0.02447700 2.56371400 1.71918700  
O 0.33917400 3.96610200 1.43693900  
N -1.40422800 2.26346600 0.90668000  
C -1.95349900 0.90274300 0.95050500  
C -3.39717800 0.84044900 1.40814200  
O -3.80030400 -0.52586500 1.23543300  
P -5.23491300 -0.76369800 0.47055200  
O -5.26106700 0.13365800 -0.76513100  
O -6.30300500 -0.29072100 1.49266300  
O -5.29504800 -2.26446400 0.15999200



C 1.24009300 1.42272500 1.09589000  
C 1.38591400 1.18098600 -0.29858000  
C 2.33675700 0.27334000 -0.74272300  
C 2.13623300 0.79819800 1.99034700  
C 3.10836200 -0.09303400 1.54738300  
C 3.18476900 -0.37120900 0.16650500  
O 4.05684400 -1.31762200 -0.43280700  
C 4.95987300 -2.01467900 0.26446000  
F 5.63223900 -2.81111700 -0.59295100  
F 5.85818200 -1.23117800 0.90294800  
F 4.41181100 -2.81858400 1.20829600  
H -1.34026000 0.26957600 1.60126500  
H -1.91807100 0.45151900 -0.05087500  
H -3.49483800 1.12677900 2.46684600  
H -4.02553800 1.51783000 0.80708800  
H 0.74657600 1.67826000 -1.03106600  
H 2.43645500 0.04848500 -1.80463000  
H 2.05153200 1.01098000 3.05569900  
H 3.80194700 -0.53593700 2.26824900  
H -1.41832700 2.71444600 -0.02736200  
N -5.52642300 6.51053100 3.39523000  
C -4.56527900 6.87148700 2.35399200  
C -3.78599200 5.63698800 1.83480900  
C -3.09698600 5.89439300 0.51694000  
C -3.80629000 5.80577500 -0.68214500  
C -3.20584400 6.12062100 -1.90155100  
C -1.84925100 6.47976200 -1.93583200  
C -1.13145900 6.56530400 -0.73832700  
C -1.76160300 6.28640300 0.47308800  
C -5.33267400 7.50456800 1.21136400  
O -6.40769600 7.00553800 0.81817900  
N -4.76740900 8.58346800 0.65829400  
C -5.15839100 9.11611700 -0.65019300  
C -6.15631800 10.31437300 -0.59290900  
C -7.49864800 9.87813100 -0.01455700  
C -5.55580100 11.46479200 0.18556000  
C -3.92467000 9.56422300 -1.41471700  
O -2.84440100 9.76726300 -0.80211000  
N -1.87700600 8.91145100 5.40082700  
C -0.86556600 8.42968400 4.49289100  
C -0.93643800 6.90776900 4.44560500  
C 0.32022400 6.21226900 4.03525900  
C 1.50816100 6.47225100 4.95323200  
O 1.42141700 6.56600900 6.21902900  
O 2.58871600 6.51866800 4.35903700

C -1.16858100 9.06217200 3.13226600  
D -2.28207800 8.96103100 2.62378400  
N -0.17434900 9.71661300 2.54783200  
C -0.38663200 10.52136800 1.35691500  
C -0.27541000 12.02276100 1.69488900  
C -1.28441700 12.51679700 2.74381900  
C -0.97231000 13.96303400 3.10372300  
C -2.70994000 12.39747400 2.18315100  
C 0.59793400 10.12671800 0.27564300  
D 1.80835700 10.12026300 0.50811900  
N 0.06733300 9.77940400 -0.89534800  
C 0.92030700 9.29212800 -2.00067200  
C 1.31550000 10.42990400 -2.90832900  
D 0.45636000 11.27591800 -3.26765800  
N 4.61092800 0.21626300 -8.47204100  
C 4.58992400 -1.24225900 -8.61783200  
C 5.91576400 -1.76917100 -9.19471700  
C 7.17723300 -1.24289500 -8.53163200  
C 7.38045200 -1.95316200 -7.21138500  
C 8.38362400 -1.44909000 -9.42998800  
C 4.13879300 -1.99906000 -7.36632700  
D 4.14200500 -3.22998400 -7.38470100  
N 3.72534400 -1.29364100 -6.30184200  
C 3.12759100 -1.99977500 -5.13404900  
C 3.83413900 -1.63978700 -3.82618100  
C 1.62715100 -1.74089600 -5.03757800  
D 0.97250200 -2.13497600 -4.06634200  
N 1.09480700 -1.07668100 -6.05542200  
C -0.30945300 -0.66454100 -6.07851100  
C -0.42288100 0.84678300 -6.28785600  
C -0.06631500 1.61746400 -5.04677200  
D -0.80528900 1.49102000 -4.03059200  
D 0.96423700 2.35594900 -5.07986300  
C -1.16619600 -1.38713200 -7.08631800  
D -0.77938200 -1.56405800 -8.25055000  
N -2.34266300 -1.82247000 -6.62116800  
C -3.34222600 -2.40298000 -7.50197800  
C -4.06131900 -1.33381400 -8.33545400  
D -3.71618200 -0.12694600 -8.24337300  
N -6.92748300 0.33198000 -8.32049400  
C -7.60198100 1.50809700 -7.78178200  
C -8.35310800 1.19051800 -6.47798100  
D -9.34021000 0.17335400 -6.74728800  
C -9.02318400 2.46532100 -5.92400600  
C -6.59213800 2.63627900 -7.58988200

D -6.83514600 3.78192300 -7.98462000  
N -5.44005300 2.31090800 -6.99964700  
C -4.46394900 3.35651900 -6.72945500  
C -3.66839000 3.07535200 -5.42957900  
C -4.65057600 3.19716200 -4.24375500  
C -4.13614700 2.66159600 -2.92342300  
C -2.47619800 4.03054000 -5.30866800  
C -3.64509300 3.66556800 -7.98835400  
D -3.23924600 4.83744100 -8.20309300  
N 4.14262500 10.02028900 4.17410100  
C 4.16169500 9.91357300 2.71687700  
C 5.28791900 10.77159500 2.12241800  
C 5.30063300 12.25010700 2.45929000  
C 6.35521500 12.93400300 1.60264300  
C 3.89812200 12.81268000 2.18711200  
C 4.41540500 8.48770400 2.28223000  
D 5.22355000 7.74455100 2.89507100  
N 3.74483100 8.11481300 1.19257800  
C 4.00261400 6.86401600 0.50753900  
C 2.67987800 6.10956500 0.19217100  
C 2.85002600 4.69933800 -0.42929800  
C 3.24239700 4.77780500 -1.91123400  
C 3.75362500 3.74544500 0.33682000  
C 4.77197000 7.22472700 -0.75703100  
D 4.21994400 7.86059800 -1.68370500  
N 6.04361600 6.82290600 -0.79043900  
C 6.92210900 7.18574700 -1.87804800  
C 8.16122400 7.91189300 -1.34681200  
C 7.88055700 9.20386900 -0.59021900  
S 6.94655400 10.41944100 -1.53651900  
C 7.98113900 10.62460600 -2.98983800  
C 7.41792300 5.95324500 -2.61111600  
D 7.49498600 4.86720400 -2.04548500  
N 7.82227800 6.18031200 -3.84721700  
C 8.67622000 5.23686300 -4.55076400  
C 8.09413100 4.92602200 -5.93630400  
C 6.87690000 4.02387000 -5.80527400  
C 7.02231100 2.63748000 -5.81276400  
C 5.92295700 1.79931500 -5.67559000  
C 4.67764900 2.34100800 -5.48194500  
D 3.59778000 1.46671700 -5.35456900  
C 4.49246500 3.72184600 -5.44695100  
C 5.60389000 4.55536300 -5.60134800  
C 10.09497200 5.79852400 -4.60610800  
D 10.27906300 7.04301100 -4.61686600

N 7.39949600 6.23410300 3.91737400  
C 7.46182700 4.79938400 3.61733400  
C 6.06076400 4.19947400 3.84961600  
C 5.96368000 2.66682900 3.84445400  
C 4.54418900 2.28679900 4.27364800  
C 6.24198500 2.08228900 2.47818400  
C 7.86566700 4.72363500 2.15416900  
D 7.16421100 5.22974200 1.28363600  
N 9.03811100 4.15633000 1.88987300  
C 9.49440500 4.03969300 0.50446300  
C 10.99325800 4.34752200 0.32549500  
C 11.31885100 4.41316800 -1.16867000  
C 11.36800100 5.66222300 1.01191700  
C 9.19165500 2.60372400 0.10143400  
D 9.84526400 1.64503200 0.59490200  
N 8.20082900 2.45420200 -0.77644400  
C 7.56806700 1.12338500 -1.00140700  
C 6.27924300 1.27552200 -1.82051900  
C 8.48333600 0.06240100 -1.61004300  
D 8.34778900 -1.13670200 -1.31946600  
N 9.43446200 0.49437200 -2.43337300  
C 10.32929100 -0.41687700 -3.14830300  
C 10.27305300 -0.16499300 -4.67263900  
C 10.59087600 1.27310700 -5.05808300  
D 10.58377600 2.15552800 -4.18918000  
D 10.87168100 1.53038800 -6.25470600  
C 11.75004500 -0.39804900 -2.59358800  
D 12.69362900 -0.78285500 -3.27519300  
N 11.88838300 0.01054900 -1.32765400  
C 13.16346500 -0.11714700 -0.60582100  
C 13.67651900 1.26454500 -0.09529900  
C 14.95209900 1.14222400 0.73133400  
C 13.93103000 2.20436000 -1.25927100  
C 12.96450900 -1.09054700 0.56365300  
D 12.35912600 -0.71322200 1.60044500  
N 8.21249300 -2.31705600 6.60947500  
C 7.15370700 -3.24745800 6.36334200  
C 7.04051400 -3.49867000 4.84404300  
C 6.70351200 -2.19802800 4.08075700  
C 5.28802700 -1.68780000 4.21146800  
C 6.09944300 -4.66097900 4.56650000  
C 7.48193500 -4.56718400 7.03177900  
D 8.60728900 -5.10145200 6.85143900  
C 3.14782800 3.57212400 11.43032300  
C 3.23246700 4.86241500 10.86486300

C 3.05791100 5.05496400 9.49121500  
C 2.79043000 3.92610600 8.68770100  
D 2.62790300 4.03043300 7.31749100  
C 2.70289800 2.66915600 9.23981100  
C 2.86777000 2.50184400 10.60218500  
N 4.62294200 -0.85593800 9.78911900  
C 3.58906400 -1.27243700 8.84907400  
C 3.95302200 -0.81384900 7.43274800  
C 2.76381000 -0.70333500 6.54373600  
C 2.11565700 -1.84661000 6.04464200  
C 0.96912000 -1.72050300 5.24938000  
C 0.50392300 -0.46908100 4.91838900  
D -0.62037400 -0.30405800 4.11754600  
C 1.14004200 0.66798800 5.39911500  
C 2.26229400 0.53232800 6.20779200  
C 3.42801100 -2.78975700 8.87544600  
D 4.36812300 -3.52905300 8.48271700  
N 1.79745100 -5.65959100 7.16055500  
C 1.10215900 -6.07525500 5.94806700  
C 2.09181400 -6.63897300 4.91180600  
C 2.78449900 -5.77654800 3.89403200  
C 3.68065000 -6.66101300 3.03414900  
C 1.77294400 -4.99502400 3.04812000  
C 0.11646000 -7.19110900 6.23241100  
D 0.48912900 -8.20180900 6.85580600  
N -1.10334500 -7.04762000 5.72854600  
C -2.11959600 -8.05675600 5.98915200  
C -3.51500100 -7.46133300 5.80506000  
D -3.79495200 -7.28755700 4.43343000  
C -1.96999300 -9.31467700 5.12429500  
D -2.49924500 -10.37532900 5.49494000  
N -1.25596500 -9.19479700 3.99578200  
C -1.12623600 -10.27699100 3.01127900  
C -2.45096100 -10.46850700 2.26693300  
C -2.99764300 -9.15990000 1.69338800  
C -4.05759500 -9.40618100 0.62756600  
N -4.67396400 -8.16350400 0.13071900  
C -4.10717300 -7.33554300 -0.74699700  
N -2.87647100 -7.56331300 -1.24137000  
N -4.77339800 -6.24906100 -1.13933100  
C -0.06764200 -9.89732900 1.99382300  
D 0.36339100 -8.71580700 1.94486400  
N 0.90507500 -9.66157100 -2.19265100  
C 0.22216700 -8.97752700 -3.28190400  
C 0.38206100 -7.47802800 -3.20518100

D 1.33613000 -6.96747300 -2.60331200  
N -0.53236500 -6.75773800 -3.85709400  
C -0.45274300 -5.28174000 -3.95687700  
C -0.30809500 -4.79572100 -5.42493800  
C 1.00700800 -5.30660100 -6.00717000  
C -1.51071000 -5.23719900 -6.26845300  
C -1.68249500 -4.65988900 -3.32710300  
D -2.62173700 -5.37625700 -2.95820700  
N -1.71607400 -3.32506100 -3.21732400  
C -2.87589400 -2.66154300 -2.58158800  
C -2.72502100 -1.13566700 -2.55778700  
D -2.64912300 -0.60125700 -3.89201600  
C -1.47143300 -0.75492800 -1.77409600  
C -4.16549500 -3.00852000 -3.30302400  
D -4.14698800 -3.27544600 -4.50978000  
N -5.26239300 -3.09495100 -2.55179500  
C -6.58306900 -3.24540600 -3.17339700  
C -7.63827000 -3.72809700 -2.19914900  
D -7.38343700 -4.63529800 -1.41920200  
N -8.82589000 -3.12336200 -2.27005700  
C -9.94160500 -3.47451800 -1.40089400  
C -10.96275200 -2.34474600 -1.42107100  
C -10.59478200 -4.79258400 -1.83614100  
D -11.31701000 -5.42161900 -1.05905600  
N -10.32777000 -5.20624900 -3.07040300  
C -10.91770000 -6.42697600 -3.64387700  
C -10.80396500 -6.40238900 -5.17724300  
C -9.38058000 -6.52695100 -5.73231200  
C -8.73203200 -5.18557400 -6.04026900  
D -9.09875800 -4.17892400 -5.40311100  
D -7.85219600 -5.13402800 -6.93378200  
C -10.29309400 -7.71682200 -3.07557900  
D -10.81719000 -8.82075800 -3.28628400  
N -9.18193900 -7.56035600 -2.35838400  
C -8.42036700 -8.67596900 -1.81749800  
C -7.05931500 -8.71693000 -2.53590100  
C -6.20658300 -9.92507100 -2.16811500  
D -6.60563600 -10.79288400 -1.39268100  
N -5.00317800 -9.97314200 -2.73104600  
C -8.25728600 -8.48982400 -0.30604300  
D -7.43048100 -7.65179200 0.13938000  
N -2.18759400 -2.78234800 7.34835900  
C -2.75342600 -2.29046800 6.07484900  
C -2.67571000 -3.32284400 4.96986500  
D -1.92825700 -4.32212800 5.09343000

N -3.40504400 -3.01865400 3.89966800  
C -3.69746500 -3.82136900 2.70339600  
C -2.60362000 -4.82053100 2.28175000  
C -1.46265900 -4.23187600 1.46816100  
C -0.95315100 -3.00380100 1.76891700  
C 0.11075100 -2.48251700 1.07369700  
C 0.65518800 -3.18392300 0.03909800  
C 0.15834800 -4.41405300 -0.28705900  
C -0.87490600 -4.95124600 0.42905800  
C -4.99934300 -4.62863800 2.77618200  
D -5.08832600 -5.57415500 3.46482400  
N -5.99097600 -4.16163000 2.06836300  
C -7.27651000 -4.85751700 1.99690800  
C -8.25651800 -4.46658100 3.09212700  
D -9.30589500 -5.09585300 3.18358500  
N -7.93497700 -3.46407300 3.91190100  
C -8.83638400 -3.03178500 5.00949100  
C -8.08716000 -2.29320000 6.13385700  
C -6.96940300 -3.17442500 6.68885900  
C -7.43360900 -4.30688100 7.56481900  
C -9.05464300 -1.80846100 7.23531100  
C -9.88117400 -2.12377100 4.38808600  
D -9.55542400 -1.01189900 3.93088600  
N -11.13580100 -2.57730800 4.34886100  
C -12.20530300 -1.84259100 3.66493300  
C -12.52111500 -2.50081900 2.31640500  
D -13.07315800 -3.78771300 2.52031500  
C -13.49608900 -1.75003500 4.46790800  
D -14.48666100 -1.13139600 3.99837500  
N -4.80396300 1.01426000 8.46676500  
C -4.74361000 1.91075100 7.29728900  
C -3.29401400 1.98318900 6.73623400  
C -2.37949200 2.68524500 7.74503000  
C -0.89564200 2.38810600 7.51883100  
C -3.24943700 2.68791200 5.37822000  
C -5.68131000 1.41483200 6.20454200  
D -5.73789300 0.21281500 5.94183200  
N -6.41991400 2.32602200 5.57489900  
C -7.29876600 1.97214700 4.44837800  
C -8.78761300 2.09189400 4.85875700  
D -9.67911500 1.77831200 3.78077600  
C -7.04046700 2.92544900 3.30131000  
D -7.16122900 4.15005300 3.46867200  
N -6.71691900 2.37212200 2.13112100  
C -6.40975000 3.23293400 0.97476300

C -7.40025900 3.05722100 -0.14271500  
O -8.19943100 3.95706000 -0.42900200  
N -7.38112200 1.88336600 -0.76078900  
C -8.26006300 1.63966900 -1.90480400  
C -8.08269300 0.22029900 -2.43304300  
O -6.77811500 0.05499200 -2.96725700  
C -9.73442900 1.90343200 -1.62346500  
O -10.42447200 2.42131600 -2.49358600  
N -10.22257000 1.54802100 -0.42818200  
C -11.65002000 1.76151600 -0.13361400  
C -12.05498000 1.11353800 1.18685300  
C -12.01658400 3.24698400 -0.13741400  
O -13.13509600 3.63236200 -0.55286900  
N -11.07405300 4.07573800 0.29966900  
C -11.23001000 5.52152600 0.27792900  
C -10.15800800 6.19033100 1.15828500  
C -10.24997500 5.67688600 2.61842000  
C -11.09204000 6.50830300 3.56699500  
C -10.20602700 7.70157400 1.03081600  
C -11.15538200 6.06135400 -1.15712200  
O -12.01923900 6.86516100 -1.59755000  
N -10.14903400 5.61660400 -1.88863800  
C -9.90848700 6.09022900 -3.25291800  
C -8.54212800 5.58702300 -3.77226200  
C -8.33144700 5.92100500 -5.24660200  
C -7.41103000 6.19224400 -2.93039900  
C -11.05990900 5.66459400 -4.17374600  
O -11.41443700 6.40960100 -5.12403500  
N 13.07500600 -3.86321600 -4.33465400  
C 11.72784300 -4.40633200 -4.48008200  
C 11.73683900 -5.90344300 -4.89193900  
C 12.32960700 -6.06026700 -6.29508400  
C 12.44852100 -6.77775500 -3.84984900  
C 11.00151900 -4.26044100 -3.15785400  
O 11.63056500 -4.19368800 -2.11433900  
N 9.66129900 -4.28200400 -3.18762900  
C 8.95563700 -4.31850400 -1.91713500  
C 7.49664700 -4.50793200 -2.34392200  
C 7.42028100 -3.87326400 -3.72159400  
C 8.74800400 -4.20999500 -4.34336600  
C 9.39388000 -5.49485500 -1.03649300  
O 9.77701900 -6.56443600 -1.54954300  
N 9.35419200 -5.28206700 0.26606500  
C 9.78978300 -6.27704800 1.24267700  
C 9.41112500 -5.80214600 2.66039600



C 10.08830900 -6.63829600 3.74533400  
C 11.56353000 -6.34764900 3.79551300  
O 11.96990600 -5.19480000 3.92930600  
N 12.38329100 -7.40124700 3.68693900  
C 9.18621900 -7.66130100 0.97116400  
O 9.87249500 -8.69310100 1.10398700  
N 7.91059800 -7.68948800 0.58242600  
C 7.20526900 -8.94902500 0.32379300  
C 5.73256200 -8.69220000 -0.09852700  
C 4.87778900 -9.97680800 -0.00248000  
C 4.56510300 -10.38360900 1.42140100  
C 5.67700800 -8.08104400 -1.49707000  
C 7.93601700 -9.82663100 -0.68846100  
O 7.84539800 -11.08001100 -0.61651400  
O -5.16834800 -0.17252500 -5.27647600  
O 4.61777700 6.98493200 5.79610800  
O 6.30108500 -5.25097900 0.92069800  
O -8.92159900 -0.46128500 1.14561400  
O 8.20881500 -2.78590400 0.96305400  
O 3.86724300 -5.27627200 -0.25672700  
O -5.79243400 -1.49414500 3.80322900  
O 2.21155700 -7.48074300 -0.01451900  
O -6.85120800 -2.03464200 -6.47503700  
O 4.74500700 -5.23327500 -5.62294000  
O 3.37166200 -5.03611900 -2.97840900  
O 10.60230000 -3.01180900 5.06538300  
O -7.20424800 -7.00180300 4.84833000  
O -9.59026700 -1.82334600 -4.86835000  
O 9.75596700 -1.26860200 2.56034900  
O -5.26999700 -5.10256200 -6.12917000  
O 9.03689100 0.85955900 3.44289500  
O -1.01117100 3.17409600 -1.72949200  
H -3.04051600 5.32595700 2.59568000  
H -4.48821800 4.78032700 1.70129700  
H -1.17951400 6.34304700 1.40577900  
H -4.85522800 5.47267500 -0.67234100  
H -0.05814100 6.80373300 -0.75093200  
H -3.77719500 6.02150600 -2.83292300  
H -1.35403400 6.67082800 -2.89310600  
H -3.82018400 7.59639500 2.80634600  
H -5.02757200 6.06960900 4.14238800  
H -6.23720000 5.87110500 3.06655500  
H -6.32918900 10.64579000 -1.64680900  
H -8.22861000 10.69639900 -0.06797600  
H -7.42026300 9.57656300 1.03933900

H -7.91526000 9.02198200 -0.56587400  
H -4.60491700 11.80809400 -0.24682400  
H -6.23747600 12.32614800 0.19877200  
H -5.35472400 11.19852500 1.23405600  
H -5.66550700 8.28587200 -1.21929300  
H -3.92320700 8.95072000 1.05732600  
H -1.20632700 6.51764100 5.45342100  
H -1.77109400 6.58735400 3.77721200  
H 0.58103800 6.47189600 2.98522700  
H 0.14224900 5.11689100 4.01927500  
H 0.13691800 8.73831200 4.89306500  
H -1.67620300 8.59536400 6.32847000  
H -2.78307700 8.57616300 5.13457200  
H 0.75615600 12.25193500 2.04250100  
H -0.40908300 12.60250900 0.75930000  
H -1.20773500 11.89182300 3.66535900  
H -1.01069000 14.61813100 2.22287800  
H 0.02887200 14.06025800 3.54348700  
H -1.69438900 14.35103900 3.83351500  
H -3.46323900 12.54697900 2.96520400  
H -2.89823200 13.13441500 1.39099600  
H -2.86643700 11.39571400 1.74337300  
H -1.46366200 10.37348100 1.03136700  
H 0.73004700 9.76504000 2.97155000  
H 1.80861700 8.75206800 -1.59040800  
H 0.34780500 8.53929500 -2.58599100  
H -0.93842800 9.78843600 -1.03215800  
H 5.94270900 -1.50359400 -10.27360700  
H 5.91420900 -2.87886700 -9.17414700  
H 7.08247300 -0.14251500 -8.32773700  
H 8.31384800 -1.63269700 -6.72082800  
H 6.56415700 -1.74076400 -6.50563100  
H 7.43648900 -3.04479100 -7.32982900  
H 9.30139300 -1.08767600 -8.94645500  
H 8.27701200 -0.90805300 -10.37952500  
H 8.53215400 -2.51027500 -9.67118700  
H 3.78465100 -1.46726100 -9.36657300  
H 4.56939600 0.63881000 -9.37456400  
H 5.44679900 0.51747500 -8.00107100  
H 4.89045300 -1.94755600 -3.84647600  
H 3.80779700 -0.55932400 -3.61675300  
H 3.35754400 -2.15298500 -2.97763300  
H 3.24576200 -3.11412100 -5.27288300  
H 3.84786600 -0.28682200 -6.19168200  
H 0.19026700 1.17092800 -7.15595200

H -1.46963300 1.09850800 -6.56905000  
H -0.71042100 -0.86324900 -5.03651800  
H 1.63883700 -0.74341600 -6.82321900  
H -2.86626000 -3.14139200 -8.18155300  
H -4.08594600 -2.96712200 -6.88417100  
H -2.68883700 -1.44685500 -5.74412300  
H -7.64568400 0.78938200 -5.70507400  
H -9.70843300 2.91907900 -6.65081200  
H -8.26612700 3.21800600 -5.66003000  
H -9.59786700 2.24229300 -5.01363000  
H -9.36828800 -0.36416600 -5.95286600  
H -8.35680100 1.82294200 -8.54822000  
H -6.44886500 0.58944900 -9.15965200  
H -6.27830500 -0.04513500 -7.65826900  
H -3.26321400 2.02837100 -5.44347600  
H -2.78924600 5.08164200 -5.36132000  
H -1.96070400 3.88418000 -4.34667900  
H -1.74096500 3.85144700 -6.10367900  
H -4.92745300 4.26831800 -4.12529300  
H -5.60271400 2.67724300 -4.47832600  
H -3.09062000 2.31593200 -2.99255200  
H -4.17799500 3.42620200 -2.13269500  
H -4.72197100 1.79727600 -2.57624800  
H -5.02368800 4.31748200 -6.52052300  
H -5.34651300 1.44555800 -6.46996400  
H 6.27075400 10.33734700 2.41151300  
H 5.23903300 10.66018500 1.01494000  
H 5.54305000 12.39457200 3.53853800  
H 3.78804700 13.82646900 2.59079900  
H 3.69036700 12.85985500 1.10950000  
H 3.11695100 12.17877100 2.63772300  
H 6.36891400 14.01700900 1.78128700  
H 7.35903900 12.54966400 1.82595700  
H 6.17612500 12.77898500 0.52864000  
H 3.17142400 10.33588300 2.38879000  
H 3.44850200 9.39928900 4.54299700  
H 5.03332900 9.76057700 4.55126700  
H 2.03574300 6.71445800 -0.48298100  
H 2.11130900 5.99755300 1.14180800  
H 1.81894300 4.26052500 -0.42311200  
H 4.55313300 4.30813600 0.85563900  
H 4.24422200 3.01000800 -0.32673300  
H 3.20415100 3.18740400 1.10809800  
H 2.64713000 5.53116300 -2.44352600  
H 4.30144600 5.03153500 -2.04728500

H 3.07662100 3.81456800 -2.41406200  
H 4.59235200 6.15423100 1.16857500  
H 3.04598400 8.73221700 0.78829300  
H 8.85151000 8.13216300 -2.19005900  
H 8.73516100 7.23546000 -0.67160600  
H 8.83853900 9.63068700 -0.23933900  
H 7.27739100 9.01483100 0.32363300  
H 7.60895600 11.48666900 -3.55581400  
H 9.03388600 10.81131900 -2.74797200  
H 7.95209700 9.75469100 -3.65953100  
H 6.36470400 7.88522000 -2.56619700  
H 6.42165600 6.22130000 -0.06434300  
H 7.82404700 5.85165100 -6.48166900  
H 8.86517500 4.41648200 -6.54837100  
H 8.02670800 2.20176300 -5.93061500  
H 5.46327100 5.64141900 -5.56815000  
H 6.07249300 0.71133700 -5.69018000  
H 3.49538400 4.15163400 -5.27940700  
H 2.75451100 1.95156400 -5.27429300  
H 8.71185700 4.25835500 -3.98978900  
H 7.81046300 7.11340400 -4.20812300  
H 5.67399400 4.56180100 4.82966900  
H 5.34922900 4.60886600 3.09489300  
H 6.69673100 2.24893800 4.57619300  
H 3.79862900 2.65434000 3.55260600  
H 4.28808900 2.71228200 5.25444200  
H 4.42176700 1.19517800 4.34723600  
H 5.67407700 2.60146600 1.68903700  
H 7.30665000 2.13471500 2.20662600  
H 5.95216000 1.01910300 2.43013600  
H 8.20307700 4.31319700 4.29953600  
H 7.18382500 6.35422500 4.88738500  
H 6.68227100 6.69336900 3.36828600  
H 11.60238400 3.52469900 0.78173400  
H 12.41517700 5.92149300 0.80779400  
H 10.74609300 6.49453400 0.65234600  
H 11.25123400 5.60450300 2.10131000  
H 12.39006300 4.59934700 -1.32812100  
H 10.76892600 5.22515500 -1.66599400  
H 11.06224200 3.47520300 -1.68384000  
H 8.93882700 4.79471900 -0.12255400  
H 9.47550600 3.55507700 2.55898900  
H 5.55275400 1.93696500 -1.30846300  
H 6.46051900 1.69652200 -2.82097000  
H 5.79114100 0.30055300 -1.95883500

H 7.28065000 0.74745800 0.02149500  
H 7.75298200 3.26052600 -1.19756200  
H 10.97848500 -0.85335200 -5.17898100  
H 9.26579100 -0.43207600 -5.05487200  
H 9.98544800 -1.47793100 -2.98978500  
H 9.53259100 1.44430400 -2.82417900  
H 12.88004500 1.71166800 0.55737100  
H 15.27996900 2.12740100 1.08747200  
H 15.77539800 0.71200000 0.14525200  
H 14.80488300 0.50557900 1.61336900  
H 14.24664400 3.19451300 -0.90116000  
H 14.72285400 1.82660300 -1.92100500  
H 13.03341000 2.35335000 -1.87778100  
H 13.94820500 -0.52482900 -1.29768000  
H 11.15535400 0.46545500 -0.81809200  
H 8.05431000 -3.81389700 4.46720000  
H 5.99320100 -4.82190000 3.48125900  
H 5.07539000 -4.50386100 4.95474700  
H 6.47389300 -5.60317800 4.98989800  
H 7.42483200 -1.39511300 4.35728100  
H 6.89391300 -2.39778200 3.00417300  
H 5.07603300 -0.87981300 3.48625800  
H 5.07627400 -1.29548400 5.22144200  
H 4.54966600 -2.48114000 4.01484300  
H 6.15211300 -2.85574200 6.72419000  
H 8.13484100 -1.94101000 7.53066300  
H 8.20178800 -1.56974400 5.93846000  
H 2.78703300 1.49415400 11.02630600  
H 3.44226200 5.72108700 11.50851000  
H 2.50288600 1.80421600 8.58445400  
H 3.11713200 6.05528900 9.04355300  
H 2.39961500 4.93949500 7.07758000  
H 4.45418000 0.17924300 7.47061700  
H 4.70457400 -1.49607900 6.95296300  
H 2.51137200 -2.84483600 6.26539500  
H 2.73030600 1.44617900 6.61533800  
H 0.46251100 -2.62421700 4.87934900  
H 0.76333900 1.68256400 5.17945700  
H -0.67542900 0.62785600 3.87856000  
H 2.63861800 -0.77192700 9.17006100  
H 4.62607800 0.14224400 9.85594700  
H 5.52074600 -1.17505500 9.48751800  
H 2.87168600 -7.22478100 5.45170700  
H 1.54479600 -7.40916100 4.31719200  
H 3.44781300 -5.02993900 4.42154800

H 2.27219600 -4.23725000 2.42912400  
H 1.04387900 -4.48319000 3.69825000  
H 1.21260400 -5.65547800 2.37093300  
H 4.16571900 -6.07026000 2.24282100  
H 4.47833500 -7.12577900 3.63011200  
H 3.11797300 -7.46781900 2.54069600  
H 0.61582000 -5.15017800 5.52106300  
H 2.11440300 -6.45441900 7.68043000  
H 2.59583300 -5.11421800 6.89305800  
H -3.63914000 -6.52026200 6.37691500  
H -4.28282700 -8.17274200 6.16300300  
H -3.73246900 -6.35318100 4.23513800  
H -2.02977400 -8.39274700 7.05861100  
H -1.41687800 -6.12844100 5.41520900  
H -2.31252300 -11.21232900 1.45580300  
H -3.20437900 -10.91374600 2.94949700  
H -2.17178800 -8.56070100 1.24212400  
H -3.41913400 -8.53170000 2.50662000  
H -3.63602800 -9.99582200 -0.21622100  
H -4.87982200 -10.02345400 1.04690600  
H -5.64945100 -8.00833500 0.39108900  
H -2.48637900 -6.82916800 -1.83772000  
H -2.22273200 -7.98051200 -0.60709800  
H -4.34883000 -5.58385300 -1.76275200  
H -5.71950200 -6.07138900 -0.86689700  
H -0.84628100 -11.21686200 3.54885000  
H -1.11408300 -8.27205200 3.62969100  
H 0.63683200 -9.34615400 -4.24281100  
H -0.84227400 -9.29219800 -3.25840200  
H 0.55127600 -9.34111800 -1.31310600  
H 1.89036100 -9.48652800 -2.22622500  
H -0.28011000 -3.67810800 -5.42848400  
H -1.44309600 -4.81150700 -7.27963200  
H -2.46570800 -4.90094300 -5.83514400  
H -1.56106800 -6.32786600 -6.38884700  
H 1.15202200 -4.92454200 -7.02686700  
H 1.87309200 -4.97879100 -5.41186100  
H 1.04088500 -6.40235900 -6.06691300  
H 0.46872600 -4.93481100 -3.39830900  
H -1.26970400 -7.20002700 -4.36327600  
H -3.64024300 -0.67639600 -2.09004200  
H -1.37966000 0.34553900 -1.70260500  
H -0.54039000 -1.10924800 -2.24223800  
H -1.50016600 -1.14631100 -0.74366000  
H -2.07146800 0.18508000 -3.88316600

H -2.90610000 -3.01713200 -1.51387200  
H -0.97703100 -2.75075200 -3.59054600  
H -6.86301400 -2.28137800 -3.66848700  
H -6.52792800 -3.98662800 -4.00771200  
H -5.26093300 -2.73539500 -1.56769500  
H -11.37342500 -2.16251200 -2.42514700  
H -10.52399800 -1.39799700 -1.06758700  
H -11.80779900 -2.57553400 -0.75660100  
H -9.55199100 -3.60863600 -0.35543200  
H -9.02001900 -2.48546500 -3.04218300  
H -11.29084100 -5.48794800 -5.57388400  
H -11.41018200 -7.24776600 -5.56163900  
H -8.72539800 -7.09173600 -5.03982600  
H -9.41351100 -7.13513200 -6.65777900  
H -12.00604300 -6.45794600 -3.37205200  
H -9.85275200 -4.63358700 -3.79917500  
H -6.49671500 -7.77791200 -2.34508800  
H -7.24077300 -8.73079800 -3.63433400  
H -4.83321300 -9.41582200 -3.53658700  
H -4.47989400 -10.81796600 -2.68531400  
H -8.95429700 -9.64409800 -2.01615300  
H -8.75582200 -6.66144300 -2.23186000  
H -2.20740600 -1.36587700 5.78399800  
H -3.80246900 -1.97924900 6.28410800  
H -1.20329300 -2.92381600 7.24357000  
H -2.61123000 -3.65519400 7.58762200  
H -2.15397800 -5.33123500 3.16150200  
H -3.06551500 -5.62912400 1.67683400  
H -1.37814000 -2.39479200 2.58066800  
H -1.23119000 -5.96208100 0.20022800  
H 0.50800100 -1.49425500 1.34774300  
H 0.62411600 -4.99023000 -1.09943300  
H 1.49283000 -2.76265600 -0.53374500  
H -3.76371900 -3.04126700 1.88510400  
H -4.10035100 -2.26609700 3.97932900  
H -7.73991600 -4.63779200 1.00957600  
H -7.13731600 -5.96324400 2.03472800  
H -5.82335700 -3.37911100 1.38144400  
H -7.60588600 -1.37673400 5.69570300  
H -8.49033700 -1.42307000 8.09349100  
H -9.69456600 -0.99721600 6.86463100  
H -9.70675100 -2.61414000 7.59639000  
H -6.28108800 -2.52378400 7.27144000  
H -6.34258800 -3.57226700 5.86442000  
H -6.58439600 -4.91900800 7.89696400

H -7.94716000 -3.94811200 8.46766700  
H -8.12741100 -4.97789600 7.03799000  
H -9.29590700 -3.95485200 5.46013300  
H -7.14492500 -2.82599300 3.74692100  
H -11.62420300 -2.53252400 1.66406300  
H -13.29768400 -1.92482100 1.77611900  
H -12.44885600 -4.40886300 2.16819900  
H -11.86527500 -0.78605200 3.46350400  
H -11.25509800 -3.57129600 4.37289400  
H -2.92089200 0.93644100 6.58154900  
H -2.20694300 2.83185900 5.05255300  
H -3.71994300 3.68026400 5.41335100  
H -3.74675300 2.09970100 4.59428400  
H -2.54936400 3.77912700 7.70411200  
H -2.65058100 2.37439800 8.77838700  
H -0.27071100 2.91859200 8.24856800  
H -0.56654100 2.70105300 6.51520700  
H -0.67894600 1.31521500 7.60961900  
H -5.04487500 2.92317700 7.67015800  
H -4.72047900 0.05736000 8.18656700  
H -4.03455900 1.24452900 9.07060300  
H -9.06526800 3.12951600 5.11393600  
H -9.00231700 1.44330400 5.73098100  
H -9.59428500 0.83469900 3.62112300  
H -7.11253000 0.90044000 4.14542300  
H -6.26257100 3.29974500 5.73322300  
H -6.31525800 4.31133400 1.25894900  
H -5.38374700 2.93665100 0.62554100  
H -6.59889500 1.34971800 1.98861500  
H -8.30090300 -0.53845800 -1.65245500  
H -8.74585400 0.03351600 -3.29921800  
H -6.14628400 0.05024300 -2.22998100  
H -7.95211900 2.35338800 -2.72478800  
H -6.57630700 1.22863200 -0.64917400  
H -11.49796100 1.51709700 2.04459900  
H -13.12341400 1.27569500 1.38043900  
H -11.88460100 0.02522000 1.16967100  
H -12.24634100 1.27522000 -0.95271300  
H -9.71042000 0.90196000 0.17965000  
H -9.13873500 5.87920300 0.79775500  
H -9.44627900 8.17051900 1.67268400  
H -10.00133900 8.02649100 0.00066000  
H -11.18521900 8.11009700 1.31587400  
H -9.21467500 5.63480700 3.01954800  
H -10.61161700 4.63054700 2.65220800



H -12.12152600 6.62276200 3.20105400  
H -10.68061000 7.51740400 3.70376900  
H -11.14271300 6.03837500 4.55750300  
H -12.24318900 5.77293900 0.69073700  
H -10.16182200 3.73482800 0.54425000  
H -8.50016700 4.46959700 -3.66733100  
H -7.34233800 5.57827000 -5.58504200  
H -8.39127400 7.00155200 -5.42943700  
H -9.07984800 5.43392900 -5.88740100  
H -7.41204700 7.29068900 -2.97748100  
H -6.43072800 5.85136700 -3.29784800  
H -7.46734600 5.90969700 -1.86876000  
H -9.88984600 7.21332300 -3.24068900  
H -9.43554000 5.01554500 -1.48115900  
H 10.66989700 -6.23984900 -4.93870100  
H 13.52021400 -6.55048700 -3.77951300  
H 12.36288300 -7.83803400 -4.12275500  
H 12.00826000 -6.65792500 -2.85112800  
H 11.77444300 -5.46331600 -7.02965000  
H 13.37879300 -5.74041900 -6.33058100  
H 12.29223600 -7.10843200 -6.61859100  
H 11.23152900 -3.81219800 -5.29130200  
H 13.56204500 -4.30375200 -3.57981800  
H 13.02658300 -2.87802300 -4.17759700  
H 6.79758500 -4.00217000 -1.62721600  
H 7.18718100 -5.57851600 -2.35003300  
H 7.26116700 -2.77682500 -3.64953300  
H 6.56494100 -4.25620400 -4.30897600  
H 9.09080600 -3.44512900 -5.07396600  
H 8.73455300 -5.18012200 -4.88388000  
H 9.10800200 -3.33426100 -1.39505700  
H 9.68318300 -4.73033100 2.80140300  
H 8.30830200 -5.83831600 2.80434600  
H 9.64295400 -6.37186700 4.72895600  
H 9.85887900 -7.71415600 3.59446400  
H 13.34653700 -7.22870300 3.50662600  
H 12.02235600 -8.20919900 3.23057700  
H 10.90529600 -6.36367200 1.16564800  
H 8.99892800 -4.38832000 0.62111900  
H 5.28541700 -7.95435000 0.62273500  
H 6.27069800 -7.15193000 -1.58155700  
H 4.64099300 -7.82557700 -1.76942700  
H 6.04846800 -8.77795200 -2.26013500  
H 5.37668500 -10.80738000 -0.53856800  
H 3.92547300 -9.79384600 -0.54427900

H 4.02715800 -9.58980000 1.96117900  
H 5.48035900 -10.60554100 1.98856800  
H 3.93578200 -11.28244600 1.44280900  
H 7.17274100 -9.52749800 1.28966600  
H 7.33806600 -6.84550100 0.63084900  
H -5.80267800 -0.88030600 -5.43350900  
H -4.94949700 -0.13531100 -4.35163900  
H 3.72489000 6.63988800 5.68639200  
H 4.91063300 7.26603300 4.93037500  
H 5.42612600 -5.09989700 0.55080900  
H 6.65959300 -4.41631300 1.21337700  
H -8.88202600 -1.29036700 0.67813600  
H -8.01989600 -0.25930600 1.45060800  
H 8.16825500 -2.22382700 0.17511900  
H 8.62507800 -2.27913200 1.66679300  
H 3.67290700 -4.93046700 -1.13917900  
H 4.22893700 -6.15671300 -0.37513900  
H -5.93051800 -1.03650200 2.95300600  
H -5.91049500 -0.86475000 4.51961600  
H 1.87116500 -7.30660600 -0.89706800  
H 2.61680200 -6.66380300 0.29662800  
H -7.57654400 -1.77578300 -7.03808900  
H -6.90771500 -2.97804400 -6.32905400  
H 4.33769600 -4.56915500 -6.19433200  
H 5.67149600 -5.02168600 -5.54534000  
H 2.43875400 -4.96923700 -3.17716800  
H 3.85414800 -5.13237700 -3.80505700  
H 10.03539700 -3.30881000 5.77262000  
H 11.04754400 -3.77796100 4.68905400  
H -7.33327100 -6.64321800 3.97323300  
H -6.26611300 -7.01702500 5.01662200  
H -10.48111400 -2.12694000 -5.01452700  
H -8.98814300 -2.44641000 -5.29877800  
H 10.62766400 -1.08030100 2.18880500  
H 9.87569800 -1.68706200 3.41381800  
H -6.17379300 -4.97110900 -6.42934500  
H -4.92517100 -4.27405500 -5.78485300  
H 8.23612500 0.80978300 2.92658400  
H 9.74724800 0.48052700 2.92041100  
H -1.73975700 3.18572000 -2.35368700  
H -0.28852400 2.69887000 -2.14606300  
N 2.70514800 10.55040500 -3.37365000  
H 3.22538000 9.70816900 -3.27710900  
H 2.79041300 10.97402300 -4.26782700  
N -5.15301500 -1.71892300 -9.24090900

H -5.23219700 -1.13696800 -10.04348500  
H -5.13393400 -2.68716100 -9.46178300  
N -3.33409500 2.59354500 -8.94421900  
H -2.49613700 2.76479200 -9.45178900  
H -3.36512300 1.67365900 -8.54056900  
N 13.48114300 -2.46428400 0.47273700  
H 13.04206200 -3.08467800 1.11597600  
H 13.45538800 -2.80498400 -0.46278800  
N 0.45444300 -10.90893400 1.06442100  
H 1.31102300 -10.62909700 0.63558000  
H 0.52526500 -11.79799300 1.50455600  
N -9.06609700 -9.28992300 0.62488900  
H -9.12859100 -8.89357300 1.53509200  
H -9.94837400 -9.53627600 0.24037400  
N -11.74875800 4.38588600 -3.94601700  
H -12.20294200 4.03731300 -4.75807800  
H -11.19051200 3.70573000 -3.47196000  
N 8.74571100 -9.20814600 -1.74836300  
H 9.07396200 -8.27201000 -1.56192300  
H 9.46520000 -9.81095400 -2.07614400  
N -13.58537100 -2.38287500 5.79144200  
H -14.52698500 -2.47458800 6.10350900  
H -13.10196800 -3.25164300 5.83221300  
N 11.24599000 4.88482400 -4.64679400  
H 12.04861500 5.22978400 -4.17928100  
H 11.03143200 3.89386100 -4.49621500  
N -3.99302400 9.76003700 -2.86970500  
H -3.09864800 9.75067900 -3.30645000  
H -4.63500700 9.12977600 -3.29447300  
N 6.48610400 -5.22336600 7.89194000  
H 5.57346600 -4.80890300 7.84247600  
H 6.49027500 -6.21368700 7.82341200  
N 2.17520700 -3.38765700 9.35958200  
H 1.38425300 -2.83932400 9.10723000  
H 2.07153800 -4.35051400 9.13112200  
H 3.28962900 3.43293100 12.50427000
